# Supplementary material for: Blood monocyte transcriptome and epigenome analyses reveal loci associated with human atherosclerosis
Source: PubMed Central journal article supplement (PMC5577184; doi:10.1038/s41467-017-00517-4), 2017-08-30
Supplement: 41467_2017_517_MOESM3_ESM.pdf [file 41467_2017_517_MOESM3_ESM.pdf]

## **Description of Supplementary Files**

File name: Supplementary Information

Description: Supplementary figures, supplementary tables, supplementary methods and supplementary references.

File name: Supplementary Data 1

Description: mRNA expression alterations in LPS stimulated human THP1-monocytes resulting from ARID5B knockdown. †ARID5B TFBS within 20kb of the gene start/stop coordinates, from HMR Conserved Transcription Factor Binding Sites for ARID5B

File name: Peer Review File

A) Carotid plaque score

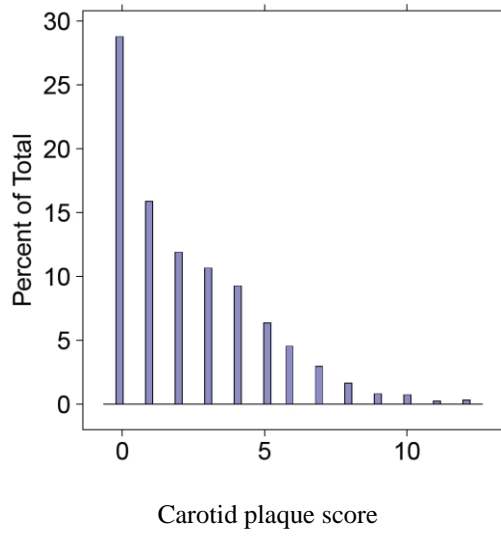

B) Coronary artery calcium score

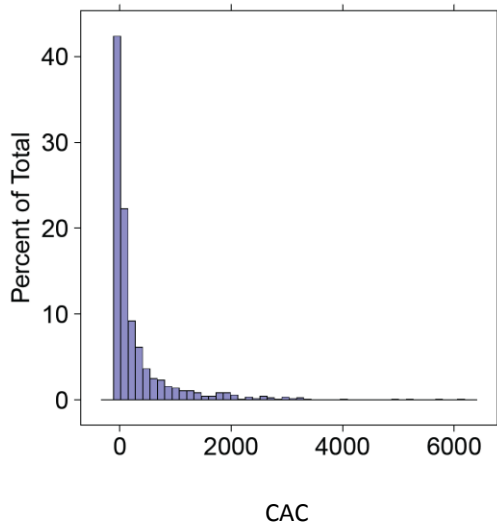

**Supplementary Figure 1. Histograms of subclinical CVD phenotypes**

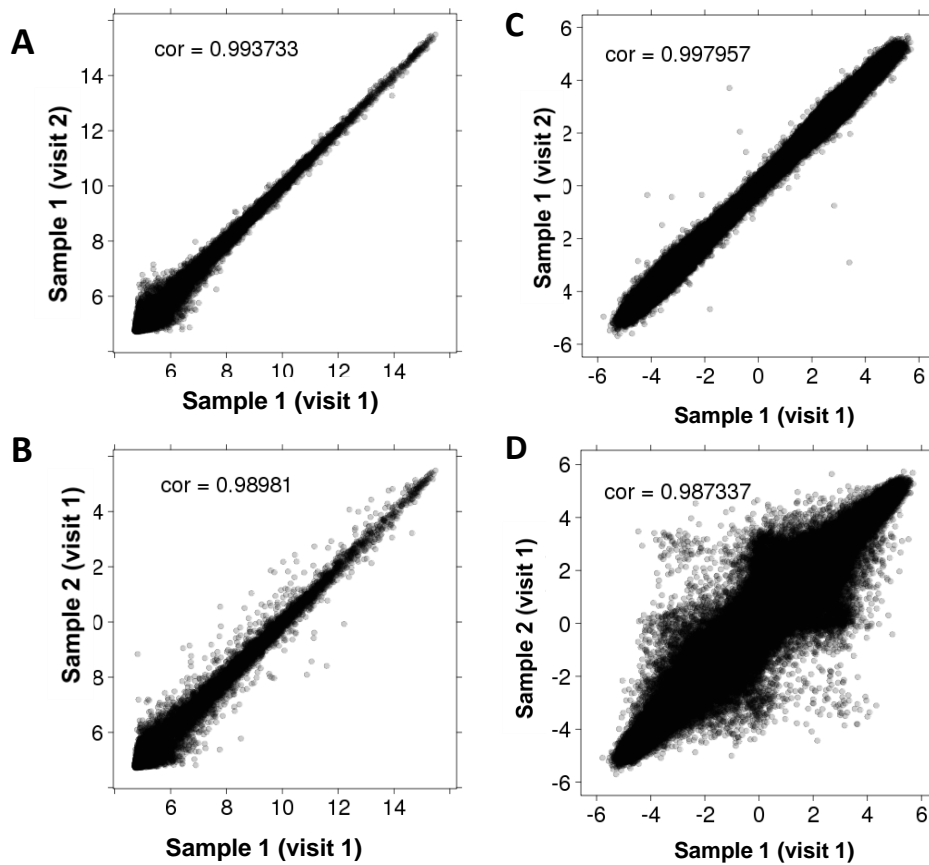

**Supplementary Figure 2. Reproducibility of Microarray mRNA Expression and DNA Methylomic Data Overtime.** **A)** Correlation of the repeated measurements of transcriptomic profiles for one subject between two visits 5-month apart; **B)** correlation of transcriptomic profiles between two subjects at visit 1; **C)** Correlation of the repeated measurements of methylomic profiles for one subject between two visits 5-month apart; **D)** correlation of methylomic profiles between two subjects at visit 1.

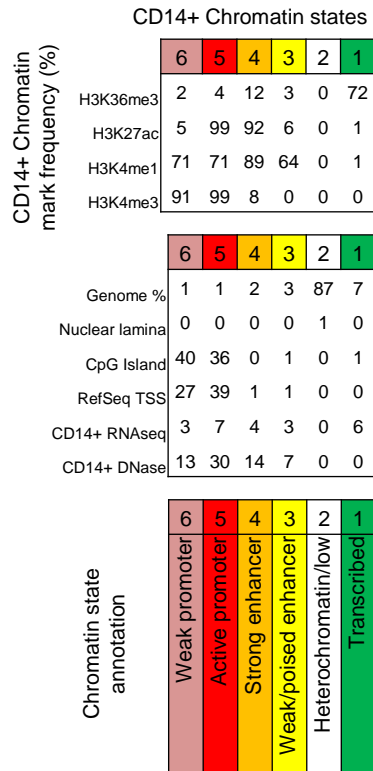

**Supplementary Figure 3. Chromatin Map of Monocytes.** Six chromatin states (top panel) predicted using ChromHMM and four CD14+ histone marks (from BLUEPRINT) are enriched with various genomic features (middle panel); annotation of the six chromatin states is provided (bottom panel).

**A**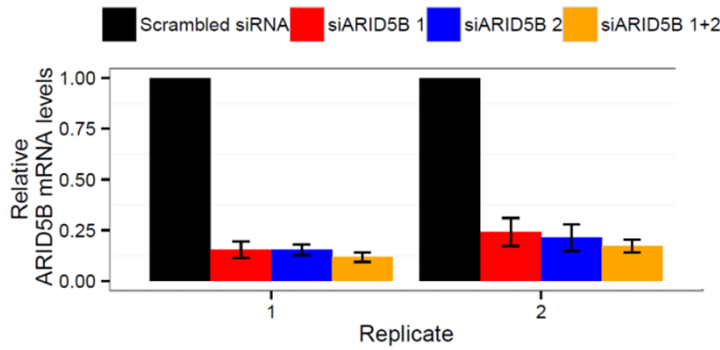**B**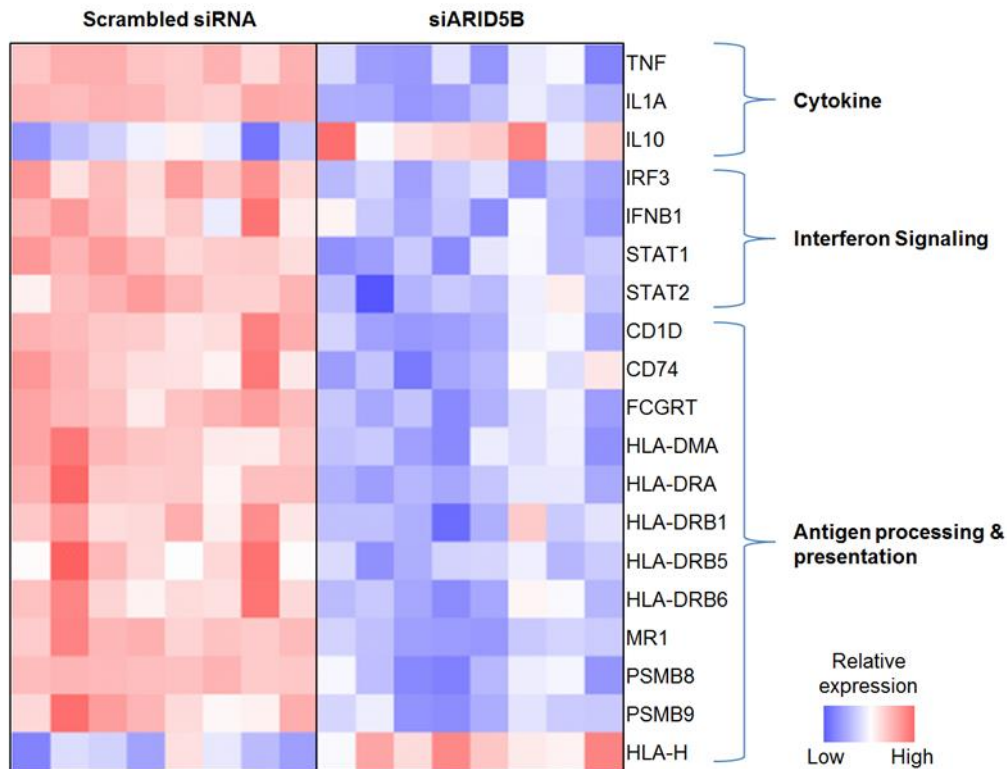

**Supplementary Figure 4. siRNA Knockdown of ARID5B alters immune/inflammatory response and lipid metabolism genes.**

**A)** Relative ARID5B mRNA expression levels in human THP1-monocytes after treatment with two ARID5B siRNA individually, and in combination. Levels shown are the average ( $\pm$ S.E.M.). After 3 h of LPS treatment ( $100 \text{ ng ml}^{-1}$ ), the THP1-monocyte transcriptome in 8 ARID5B knockdown samples compared to 8 control samples (scrambled siRNA) were enriched with inflammatory response genes; **B)** heatmap shows mRNA expression of selected key inflammatory response genes (including cytokine, interferon signaling, and antigen processing and presentation genes) in the 8 scrambled siRNA samples compared to 8 siARID5B samples.

**A**

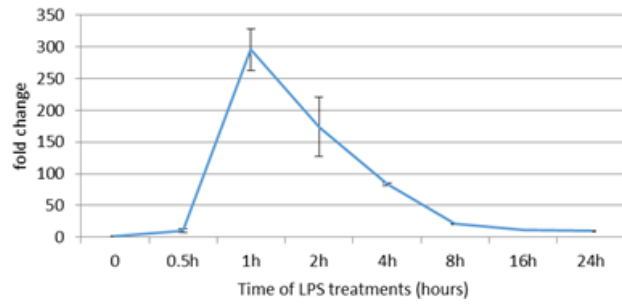

**B**

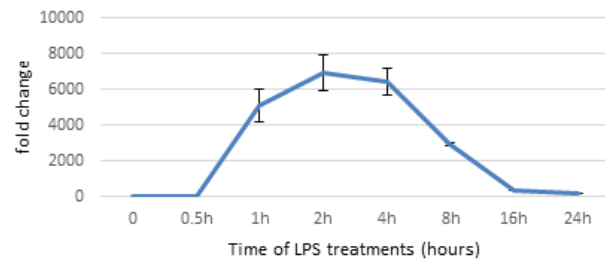

**Supplementary Figure 5. Time Course of LPS-induced *TNF* and *IL1A* Gene Expression in Human THP1 monocytes.** Gene expression of (A) *TNF* and (B) *IL1A*, in LPS (100 ng/ml) stimulated THP1 cells

**Supplementary Table 1.** Monocyte Genes with Expression Associated with Atherosclerosis (FDR < 0.20)

| Gene      |                   |     | Carotid Plaque Score (n=1,181) |      |          |          | Coronary Artery Calcium (n=1,208) |      |          |          |
|-----------|-------------------|-----|--------------------------------|------|----------|----------|-----------------------------------|------|----------|----------|
| Gene name | Illumina probe id | Chr | Beta                           | SE   | P-value  | FDR      | Beta                              | SE   | P-value  | FDR      |
| CACNA2D3  | ILMN_1754076      | 3   | -0.06                          | 0.02 | 6.71E-03 |          | -0.44                             | 0.08 | 2.08E-08 | 3.19E-04 |
| ARID5B    | ILMN_1721626      | 10  | 0.12                           | 0.02 | 6.30E-08 | 1.08E-03 | 0.32                              | 0.08 | 2.47E-05 | 3.45E-02 |
| PDLIM7    | ILMN_1690125      | 5   | 0.10                           | 0.02 | 3.56E-06 | 3.05E-02 | 0.31                              | 0.07 | 8.49E-06 | 1.95E-02 |
| LILRB4    | ILMN_2355953      | 19  | 0.07                           | 0.02 | 1.41E-03 |          | 0.32                              | 0.07 | 6.44E-06 | 1.95E-02 |
| TSPYL1    | ILMN_1779014      | 6   | -0.07                          | 0.02 | 2.10E-03 |          | -0.34                             | 0.07 | 3.57E-06 | 1.95E-02 |
| P2RX4     | ILMN_1813846      | 12  | 0.04                           | 0.02 | 4.82E-02 |          | 0.31                              | 0.07 | 8.06E-06 | 1.95E-02 |
| RSU1      | ILMN_2383344      | 10  | -0.02                          | 0.02 | 0.29     |          | -0.33                             | 0.07 | 5.29E-06 | 1.95E-02 |
| FAM168B   | ILMN_1677122      | 2   | -0.02                          | 0.02 | 0.40     |          | -0.32                             | 0.07 | 1.01E-05 | 1.95E-02 |
| CANX      | ILMN_2401057      | 5   | 0.00                           | 0.02 | 0.86     |          | -0.33                             | 0.07 | 9.58E-06 | 1.95E-02 |
| IARS      | ILMN_1733956      | 9   | -0.04                          | 0.02 | 0.07     |          | -0.31                             | 0.07 | 2.21E-05 | 3.39E-02 |
| ADM       | ILMN_1708934      | 11  | 0.02                           | 0.02 | 0.33     |          | 0.32                              | 0.07 | 2.07E-05 | 3.39E-02 |
| FAM10A4   | ILMN_1726308      | 13  | -0.04                          | 0.02 | 4.72E-02 |          | -0.29                             | 0.07 | 3.39E-05 | 4.31E-02 |
| EIF5A2    | ILMN_1735151      | 3   | 0.03                           | 0.02 | 0.16     |          | 0.29                              | 0.07 | 3.64E-05 | 4.31E-02 |
| EBAG9     | ILMN_1791896      | 8   | 0.00                           | 0.02 | 0.99     |          | -0.30                             | 0.07 | 5.17E-05 | 0.06     |
| PTPRN2    | ILMN_1728844      | 7   | -0.05                          | 0.02 | 1.34E-02 |          | -0.27                             | 0.07 | 7.93E-05 | 0.08     |
| ZNF395    | ILMN_1772876      | 8   | -0.02                          | 0.02 | 0.25     |          | -0.28                             | 0.07 | 9.50E-05 | 0.09     |
| IMPDH2    | ILMN_1705737      | 3   | -0.01                          | 0.02 | 0.70     |          | -0.28                             | 0.07 | 1.00E-04 | 0.09     |
| TRNT1     | ILMN_1764098      | 3   | -0.05                          | 0.02 | 2.72E-02 |          | -0.26                             | 0.07 | 1.26E-04 | 0.10     |
| LDLR      | ILMN_2053415      | 19  | 0.05                           | 0.02 | 3.14E-02 |          | 0.27                              | 0.07 | 1.34E-04 | 0.10     |
| F11R      | ILMN_2342033      | 1   | -0.06                          | 0.02 | 2.81E-03 |          | -0.26                             | 0.07 | 1.67E-04 | 0.11     |
| MEF2C     | ILMN_1742544      | 5   | -0.06                          | 0.02 | 3.49E-03 |          | -0.27                             | 0.07 | 1.86E-04 | 0.11     |
| GAS6      | ILMN_1779558      | 13  | 0.06                           | 0.02 | 6.38E-03 |          | 0.26                              | 0.07 | 2.11E-04 | 0.11     |
| SHKBP1    | ILMN_1765493      | 19  | 0.06                           | 0.02 | 7.86E-03 |          | 0.27                              | 0.07 | 1.69E-04 | 0.11     |
| FER1L3    | ILMN_2370976      | 10  | 0.06                           | 0.02 | 8.68E-03 |          | 0.27                              | 0.07 | 1.91E-04 | 0.11     |
| CCNB1IP1  | ILMN_2347349      | 14  | -0.04                          | 0.02 | 0.05     |          | -0.27                             | 0.07 | 2.19E-04 | 0.11     |
| OLR1      | ILMN_1723035      | 12  | 0.04                           | 0.02 | 0.05     |          | 0.26                              | 0.07 | 2.14E-04 | 0.11     |
| MXD1      | ILMN_2214678      | 2   | 0.04                           | 0.02 | 0.05     |          | 0.28                              | 0.07 | 1.60E-04 | 0.11     |
| USP14     | ILMN_1806804      | 18  | -0.03                          | 0.02 | 0.12     |          | -0.26                             | 0.07 | 2.07E-04 | 0.11     |
| FAM160B2  | ILMN_1802971      | 8   | -0.01                          | 0.02 | 0.75     |          | 0.26                              | 0.07 | 2.06E-04 | 0.11     |
| CDC42EP4  | ILMN_1745223      | 17  | 0.00                           | 0.02 | 0.93     |          | 0.29                              | 0.08 | 2.15E-04 | 0.11     |
| POLR1E    | ILMN_2110167      | 9   | -0.03                          | 0.02 | 0.15     |          | -0.26                             | 0.07 | 2.48E-04 | 0.11     |
| FGFRL1    | ILMN_1795865      | 4   | 0.04                           | 0.02 | 0.06     |          | 0.29                              | 0.08 | 2.82E-04 | 0.12     |
| SERBP1    | ILMN_1773968      | 1   | -0.03                          | 0.02 | 0.13     |          | -0.25                             | 0.07 | 3.02E-04 | 0.12     |
| DAB2      | ILMN_1764228      | 5   | 0.02                           | 0.02 | 0.37     |          | 0.25                              | 0.07 | 3.03E-04 | 0.12     |
| C19ORF39  | ILMN_1707943      | 19  | -0.02                          | 0.02 | 0.26     |          | -0.25                             | 0.07 | 3.33E-04 | 0.13     |
| RPN2      | ILMN_1693421      | 20  | -0.02                          | 0.02 | 0.28     |          | -0.25                             | 0.07 | 3.43E-04 | 0.13     |
| ALDH1A1   | ILMN_2096372      | 9   | -0.06                          | 0.02 | 1.44E-03 |          | -0.24                             | 0.07 | 3.66E-04 | 0.13     |
| CIAO1     | ILMN_2048793      | 2   | -0.05                          | 0.02 | 1.33E-02 |          | -0.26                             | 0.07 | 4.01E-04 | 0.13     |
| TPST2     | ILMN_2329679      | 22  | 0.05                           | 0.02 | 2.03E-02 |          | 0.26                              | 0.07 | 3.94E-04 | 0.13     |
| C6ORF225  | ILMN_3248941      | 6   | -0.03                          | 0.02 | 0.12     |          | -0.26                             | 0.07 | 4.00E-04 | 0.13     |
| COX17     | ILMN_2187718      | 3   | 0.03                           | 0.02 | 0.20     |          | 0.26                              | 0.07 | 3.89E-04 | 0.13     |
| SLC39A8   | ILMN_1695316      | 4   | 0.09                           | 0.02 | 3.67E-05 | 0.14     | 0.19                              | 0.07 | 6.33E-03 |          |
| RBM38     | ILMN_2404049      | 20  | 0.09                           | 0.02 | 4.28E-05 | 0.14     | 0.12                              | 0.07 | 0.09     |          |
| ALDOA     | ILMN_1741148      | 16  | 0.09                           | 0.02 | 4.84E-05 | 0.14     | 0.19                              | 0.07 | 8.76E-03 |          |
| BLCAP     | ILMN_1675612      | 20  | -0.04                          | 0.02 | 0.11     |          | -0.26                             | 0.07 | 4.44E-04 | 0.15     |
| PAQR7     | ILMN_1746618      | 1   | -0.04                          | 0.02 | 4.35E-02 |          | -0.24                             | 0.07 | 4.54E-04 | 0.15     |
| FIGNL2    | ILMN_3249343      | 12  | -0.04                          | 0.02 | 0.08     |          | -0.24                             | 0.07 | 4.86E-04 | 0.15     |
| GGCT      | ILMN_1745005      | 7   | -0.05                          | 0.02 | 2.96E-02 |          | -0.25                             | 0.07 | 5.06E-04 | 0.16     |
| FDFT1     | ILMN_2144088      | 8   | 0.07                           | 0.02 | 7.31E-04 |          | 0.23                              | 0.07 | 6.02E-04 | 0.16     |
| CREBL2    | ILMN_1660223      | 12  | -0.04                          | 0.02 | 4.87E-02 |          | -0.24                             | 0.07 | 6.22E-04 | 0.16     |
| TCIRG1    | ILMN_1711994      | 11  | 0.04                           | 0.02 | 0.07     |          | 0.24                              | 0.07 | 5.74E-04 | 0.16     |
| CENTB2    | ILMN_2088825      | 3   | -0.04                          | 0.02 | 0.07     |          | -0.24                             | 0.07 | 5.75E-04 | 0.16     |
| RRAS      | ILMN_1780825      | 19  | 0.03                           | 0.02 | 0.24     |          | 0.26                              | 0.08 | 6.12E-04 | 0.16     |
| SNHG11    | ILMN_1791884      | 20  | 0.02                           | 0.02 | 0.39     |          | 0.24                              | 0.07 | 5.78E-04 | 0.16     |
| ENPP2     | ILMN_2373791      | 8   | 0.01                           | 0.02 | 0.53     |          | 0.24                              | 0.07 | 5.71E-04 | 0.16     |

| Gene      |                   |     | Carotid Plaque Score (n=1,181) |      |          |      | Coronary Artery Calcium (n=1,208) |      |          |      |
|-----------|-------------------|-----|--------------------------------|------|----------|------|-----------------------------------|------|----------|------|
| Gene name | Illumina probe id | Chr | Beta                           | SE   | P-value  | FDR  | Beta                              | SE   | P-value  | FDR  |
| AKR1B1    | ILMN_1701731      | 7   | -0.01                          | 0.02 | 0.55     |      | -0.25                             | 0.07 | 6.22E-04 | 0.16 |
| CCNB1IP1  | ILMN_1752394      | 14  | -0.01                          | 0.02 | 0.68     |      | -0.25                             | 0.07 | 5.57E-04 | 0.16 |
| SLC25A14  | ILMN_2347044      | X   | -0.01                          | 0.02 | 0.80     |      | 0.24                              | 0.07 | 6.11E-04 | 0.16 |
| CR1       | ILMN_1767193      | 1   | 0.05                           | 0.02 | 1.86E-02 |      | 0.24                              | 0.07 | 6.97E-04 | 0.16 |
| ELMO2     | ILMN_2317730      | 20  | 0.05                           | 0.02 | 2.53E-02 |      | 0.25                              | 0.07 | 7.00E-04 | 0.16 |
| ACAA1     | ILMN_1738921      | 3   | 0.04                           | 0.02 | 3.77E-02 |      | 0.24                              | 0.07 | 7.17E-04 | 0.16 |
| CHRAC1    | ILMN_1722390      | 8   | -0.03                          | 0.02 | 0.13     |      | -0.24                             | 0.07 | 6.58E-04 | 0.16 |
| RNF144B   | ILMN_1752526      | 6   | 0.03                           | 0.02 | 0.15     |      | 0.24                              | 0.07 | 7.09E-04 | 0.16 |
| PDIA5     | ILMN_1695763      | 3   | 0.01                           | 0.02 | 0.52     |      | -0.24                             | 0.07 | 6.62E-04 | 0.16 |
| STX10     | ILMN_1753712      | 19  | 0.01                           | 0.02 | 0.76     |      | 0.24                              | 0.07 | 6.83E-04 | 0.16 |
| CDKN1A    | ILMN_1784602      | 6   | 0.00                           | 0.02 | 1.00     |      | 0.26                              | 0.08 | 6.91E-04 | 0.16 |
| RAB37     | ILMN_2255579      | 17  | -0.02                          | 0.02 | 0.32     |      | -0.25                             | 0.07 | 7.37E-04 | 0.16 |
| RAB37     | ILMN_2243912      | 17  | -0.04                          | 0.02 | 4.56E-02 |      | -0.25                             | 0.07 | 7.72E-04 | 0.16 |
| PRPF4     | ILMN_1697440      | 9   | -0.01                          | 0.02 | 0.63     |      | -0.23                             | 0.07 | 7.78E-04 | 0.16 |
| TPST2     | ILMN_1695432      | 22  | 0.07                           | 0.02 | 2.62E-03 |      | 0.24                              | 0.07 | 8.73E-04 | 0.17 |
| PIM1      | ILMN_1815023      | 6   | 0.05                           | 0.02 | 2.36E-02 |      | 0.25                              | 0.07 | 8.11E-04 | 0.17 |
| PFAS      | ILMN_1755862      | 17  | -0.03                          | 0.02 | 0.10     |      | -0.24                             | 0.07 | 8.67E-04 | 0.17 |
| ALKBH6    | ILMN_1808792      | 19  | -0.01                          | 0.02 | 0.61     |      | 0.23                              | 0.07 | 8.52E-04 | 0.17 |
| ALOX15B   | ILMN_2393149      | 17  | -0.01                          | 0.02 | 0.61     |      | -0.24                             | 0.07 | 8.39E-04 | 0.17 |
| SET       | ILMN_1742238      | 9   | 0.00                           | 0.02 | 0.99     |      | -0.24                             | 0.07 | 8.52E-04 | 0.17 |
| ATP2B1    | ILMN_1813399      | 12  | -0.09                          | 0.02 | 6.91E-05 | 0.17 | -0.09                             | 0.07 | 0.24     |      |
| MYL6      | ILMN_2326071      | 12  | 0.02                           | 0.02 | 0.29     |      | 0.24                              | 0.07 | 9.22E-04 | 0.18 |
| ABCG1     | ILMN_2329927      | 21  | -0.06                          | 0.02 | 2.39E-03 |      | -0.23                             | 0.07 | 9.35E-04 | 0.18 |
| INPP1     | ILMN_1667239      | 2   | -0.08                          | 0.02 | 8.82E-05 | 0.18 | -0.16                             | 0.07 | 1.96E-02 |      |
| MT1H      | ILMN_2124802      | 16  | 0.08                           | 0.02 | 9.82E-05 | 0.18 | 0.22                              | 0.07 | 1.62E-03 |      |
| PGD       | ILMN_1794165      | 1   | 0.09                           | 0.02 | 1.09E-04 | 0.18 | 0.20                              | 0.08 | 1.16E-02 |      |
| GALK2     | ILMN_1723124      | 15  | -0.09                          | 0.02 | 1.37E-04 | 0.18 | -0.15                             | 0.08 | 4.85E-02 |      |
| PSMD1     | ILMN_1702837      | 2   | 0.09                           | 0.02 | 1.37E-04 | 0.18 | 0.06                              | 0.07 | 0.40     |      |
| C10ORF58  | ILMN_2118472      | 10  | -0.08                          | 0.02 | 1.41E-04 | 0.18 | -0.03                             | 0.07 | 0.64     |      |
| ABCG1     | ILMN_1794782      | 21  | -0.08                          | 0.02 | 1.48E-04 | 0.18 | -0.21                             | 0.07 | 2.82E-03 |      |
| BCL2      | ILMN_2246956      | 18  | 0.11                           | 0.03 | 1.74E-04 | 0.18 | 0.16                              | 0.10 | 0.09     |      |
| RPS19     | ILMN_1784717      | 19  | 0.08                           | 0.02 | 1.75E-04 | 0.18 | 0.13                              | 0.07 | 0.06     |      |
| NICN1     | ILMN_1807211      | 3   | 0.08                           | 0.02 | 1.86E-04 | 0.18 | 0.18                              | 0.07 | 1.14E-02 |      |
| MAPK13    | ILMN_1749327      | 6   | 0.08                           | 0.02 | 1.88E-04 | 0.18 | 0.20                              | 0.07 | 5.43E-03 |      |
| PFDN2     | ILMN_1678754      | 1   | 0.08                           | 0.02 | 2.19E-04 | 0.18 | 0.16                              | 0.07 | 2.28E-02 |      |
| SAMSN1    | ILMN_1684887      | 21  | 0.08                           | 0.02 | 2.27E-04 | 0.18 | 0.20                              | 0.07 | 5.08E-03 |      |
| MID1IP1   | ILMN_1668960      | X   | -0.08                          | 0.02 | 2.30E-04 | 0.18 | -0.14                             | 0.07 | 0.06     |      |
| C1ORF24   | ILMN_1667966      | 1   | 0.07                           | 0.02 | 1.43E-03 |      | 0.23                              | 0.07 | 9.70E-04 | 0.18 |
| UBE2J1    | ILMN_1713759      | 6   | 0.05                           | 0.02 | 3.61E-02 |      | 0.25                              | 0.07 | 9.84E-04 | 0.18 |
| HIST3H2A  | ILMN_1779648      | 1   | 0.04                           | 0.02 | 4.78E-02 |      | 0.23                              | 0.07 | 9.94E-04 | 0.18 |
| ANAPC1    | ILMN_1804812      | 2   | -0.06                          | 0.02 | 6.11E-03 |      | -0.23                             | 0.07 | 1.03E-03 | 0.18 |
| CRTAP     | ILMN_1720484      | 3   | -0.04                          | 0.02 | 0.06     |      | -0.24                             | 0.07 | 1.02E-03 | 0.18 |
| RASSF2    | ILMN_2352303      | 20  | 0.00                           | 0.02 | 0.92     |      | -0.24                             | 0.07 | 1.03E-03 | 0.18 |
| PDCD4     | ILMN_1768004      | 10  | -0.05                          | 0.02 | 2.34E-02 |      | -0.23                             | 0.07 | 1.06E-03 | 0.18 |
| FDFT1     | ILMN_1741096      | 8   | 0.07                           | 0.02 | 2.44E-04 | 0.18 | 0.04                              | 0.07 | 0.55     |      |
| LYZ       | ILMN_2162972      | 12  | 0.06                           | 0.02 | 1.36E-02 |      | 0.25                              | 0.08 | 1.25E-03 | 0.19 |
| PIP5K1B   | ILMN_1736654      | 9   | -0.04                          | 0.02 | 0.05     |      | -0.23                             | 0.07 | 1.18E-03 | 0.19 |
| RAB27A    | ILMN_2329773      | 15  | -0.03                          | 0.02 | 0.12     |      | -0.24                             | 0.08 | 1.23E-03 | 0.19 |
| NCF1C     | ILMN_2112988      | 7   | 0.03                           | 0.02 | 0.13     |      | 0.23                              | 0.07 | 1.24E-03 | 0.19 |
| TMEM19    | ILMN_3251207      | 12  | -0.03                          | 0.02 | 0.14     |      | -0.24                             | 0.07 | 1.15E-03 | 0.19 |
| DLEU7     | ILMN_3307752      | 13  | -0.02                          | 0.02 | 0.30     |      | -0.24                             | 0.08 | 1.26E-03 | 0.19 |
| ZBTB17    | ILMN_1711048      | 1   | 0.02                           | 0.02 | 0.45     |      | 0.23                              | 0.07 | 1.24E-03 | 0.19 |
| EIF4EBP3  | ILMN_2197225      | 5   | -0.01                          | 0.02 | 0.66     |      | -0.23                             | 0.07 | 1.27E-03 | 0.19 |
| METAP2    | ILMN_1670420      | 12  | 0.00                           | 0.02 | 0.98     |      | -0.23                             | 0.07 | 1.26E-03 | 0.19 |
| ARAP2     | ILMN_3244434      | 4   | 0.05                           | 0.02 | 2.85E-02 |      | 0.23                              | 0.07 | 1.31E-03 | 0.19 |
| NR3C1     | ILMN_2389347      | 5   | -0.04                          | 0.02 | 4.84E-02 |      | -0.23                             | 0.07 | 1.31E-03 | 0.19 |
| PTPRO     | ILMN_1720113      | 12  | 0.03                           | 0.02 | 0.12     |      | 0.24                              | 0.07 | 1.30E-03 | 0.19 |



| Gene            |                   |     | Carotid Plaque Score (n=1,181) |      |          |     | Coronary Artery Calcium (n=1,208) |      |          |      |
|-----------------|-------------------|-----|--------------------------------|------|----------|-----|-----------------------------------|------|----------|------|
| Gene name       | Illumina probe id | Chr | Beta                           | SE   | P-value  | FDR | Beta                              | SE   | P-value  | FDR  |
| <i>C10ORF32</i> | ILMN_1772706      | 10  | -0.03                          | 0.02 | 0.10     |     | -0.23                             | 0.07 | 1.33E-03 | 0.19 |
| <i>STX12</i>    | ILMN_1773901      | 1   | -0.04                          | 0.02 | 0.06     |     | -0.23                             | 0.07 | 1.35E-03 | 0.19 |
| <i>ALPK1</i>    | ILMN_2078697      | 4   | 0.06                           | 0.02 | 5.23E-03 |     | 0.23                              | 0.07 | 1.41E-03 | 0.20 |
| <i>FAM63A</i>   | ILMN_1689552      | 1   | -0.05                          | 0.02 | 4.11E-02 |     | -0.25                             | 0.08 | 1.40E-03 | 0.20 |
| <i>ZNF770</i>   | ILMN_1734254      | 15  | 0.00                           | 0.02 | 0.88     |     | -0.23                             | 0.07 | 1.41E-03 | 0.20 |
| <i>CALML4</i>   | ILMN_1717757      | 15  | 0.04                           | 0.02 | 0.08     |     | 0.22                              | 0.07 | 1.44E-03 | 0.20 |
| <i>SLC26A6</i>  | ILMN_1785252      | 3   | 0.00                           | 0.02 | 0.83     |     | 0.23                              | 0.07 | 1.45E-03 | 0.20 |
| <i>LAIR1</i>    | ILMN_1768598      | 19  | 0.06                           | 0.02 | 7.62E-03 |     | 0.22                              | 0.07 | 1.49E-03 | 0.20 |
| <i>ATXN10</i>   | ILMN_2169676      | 22  | -0.05                          | 0.02 | 1.79E-02 |     | -0.22                             | 0.07 | 1.47E-03 | 0.20 |
| <i>FBL</i>      | ILMN_1719205      | 19  | 0.03                           | 0.02 | 0.15     |     | -0.24                             | 0.08 | 1.50E-03 | 0.20 |
| <i>CRY1</i>     | ILMN_2202637      | 12  | -0.04                          | 0.02 | 0.05     |     | -0.22                             | 0.07 | 1.52E-03 | 0.20 |

Sorted by most significant association (FDR) with carotid plaque burden or CAC; FDR  $\geq$ 0.20 are left blank.

**Supplementary Table 2.** Race/ethnicity and sex-stratified analysis of genes with mRNA expression associated with Atherosclerosis

**Carotid Plaque Score associated gene expression (FDR≤0.05):**

| Gene          | African American (N=260) |      |       | Caucasian (N=532) |      |         | Hispanic (N=372) |      |       | Women (N=603) |      |         | Men (N=561) |      |         |
|---------------|--------------------------|------|-------|-------------------|------|---------|------------------|------|-------|---------------|------|---------|-------------|------|---------|
|               | Beta                     | SE   | P-val | Beta              | SE   | P-val   | Beta             | SE   | P-val | Beta          | SE   | P-val   | Beta        | SE   | P-val   |
| <i>ARID5B</i> | 0.13                     | 0.06 | 0.019 | 0.15              | 0.03 | 2.3E-06 | 0.06             | 0.04 | 0.17  | 0.08          | 0.03 | 0.014   | 0.14        | 0.03 | 1.0E-05 |
| <i>PDLIM7</i> | 0.05                     | 0.05 | 0.27  | 0.09              | 0.03 | 2.6E-03 | 0.08             | 0.04 | 0.034 | 0.10          | 0.03 | 8.6E-04 | 0.05        | 0.03 | 0.13    |

**Coronary artery calcium associated gene expression (FDR≤0.05):**

| Gene            | African American (N=259) |      |         | Caucasian (N=544) |      |         | Hispanic (N=387) |      |       | Women (N=613) |      |         | Men (N=577) |      |         |
|-----------------|--------------------------|------|---------|-------------------|------|---------|------------------|------|-------|---------------|------|---------|-------------|------|---------|
|                 | Beta                     | SE   | P-val   | Beta              | SE   | P-val   | Beta             | SE   | P-val | Beta          | SE   | P-val   | Beta        | SE   | P-val   |
| <i>CACNA2D3</i> | -0.64                    | 0.16 | 7.4E-05 | -0.25             | 0.12 | 0.029   | -0.26            | 0.14 | 0.078 | -0.12         | 0.11 | 0.28    | -0.56       | 0.12 | 1.6E-06 |
| <i>ARID5B</i>   | 0.36                     | 0.19 | 0.057   | 0.14              | 0.10 | 0.16    | 0.20             | 0.14 | 0.15  | 0.06          | 0.11 | 0.56    | 0.33        | 0.11 | 1.9E-03 |
| <i>PDLIM7</i>   | 0.07                     | 0.15 | 0.63    | 0.21              | 0.10 | 0.042   | 0.27             | 0.13 | 0.033 | 0.11          | 0.10 | 0.28    | 0.26        | 0.10 | 0.010   |
| <i>TSPYL1</i>   | -0.28                    | 0.14 | 0.054   | -0.28             | 0.09 | 2.4E-03 | -0.19            | 0.14 | 0.15  | -0.28         | 0.08 | 8.9E-04 | -0.29       | 0.11 | 9.5E-03 |
| <i>RSU1</i>     | -0.32                    | 0.16 | 0.044   | -0.19             | 0.10 | 0.056   | -0.24            | 0.12 | 0.047 | -0.27         | 0.09 | 3.6E-03 | -0.19       | 0.10 | 0.067   |
| <i>LILRB4</i>   | 0.39                     | 0.14 | 6.1E-03 | 0.23              | 0.09 | 0.014   | 0.29             | 0.14 | 0.032 | 0.23          | 0.09 | 0.011   | 0.33        | 0.10 | 9.7E-04 |
| <i>P2RX4</i>    | 0.20                     | 0.16 | 0.22    | 0.36              | 0.10 | 2.3E-04 | 0.10             | 0.12 | 0.37  | 0.22          | 0.09 | 0.016   | 0.26        | 0.10 | 9.4E-03 |
| <i>CANX</i>     | -0.19                    | 0.16 | 0.22    | -0.32             | 0.10 | 2.1E-03 | -0.21            | 0.13 | 0.12  | -0.31         | 0.09 | 8.6E-04 | -0.23       | 0.11 | 0.034   |
| <i>FAM168B</i>  | -0.27                    | 0.16 | 0.090   | -0.24             | 0.10 | 0.013   | -0.26            | 0.12 | 0.038 | -0.24         | 0.09 | 7.4E-03 | -0.29       | 0.11 | 5.6E-03 |
| <i>ADM</i>      | 0.29                     | 0.14 | 0.045   | 0.26              | 0.11 | 0.016   | 0.27             | 0.14 | 0.049 | 0.17          | 0.10 | 0.084   | 0.39        | 0.11 | 2.3E-04 |
| <i>IARS</i>     | -0.30                    | 0.17 | 0.078   | -0.21             | 0.10 | 0.032   | -0.23            | 0.12 | 0.061 | -0.18         | 0.09 | 0.055   | -0.30       | 0.10 | 3.6E-03 |
| <i>FAM10A4</i>  | -0.36                    | 0.15 | 0.016   | -0.18             | 0.10 | 0.065   | -0.19            | 0.13 | 0.16  | -0.30         | 0.09 | 1.1E-03 | -0.14       | 0.10 | 0.17    |
| <i>EIF5A2</i>   | 0.32                     | 0.14 | 0.025   | 0.30              | 0.10 | 2.5E-03 | 0.04             | 0.13 | 0.76  | 0.24          | 0.09 | 6.8E-03 | 0.18        | 0.11 | 0.098   |

**Supplementary Table 3.** Gene co-expression networks associated with subclinical atherosclerosis

| Module name | Genes                                                                                                                                                                                                 | Module<br>*Enriched Bio-functions                                                                    | †Carotid Plaque Score |             |                 | †Coronary Artery Calcium |             |                 |
|-------------|-------------------------------------------------------------------------------------------------------------------------------------------------------------------------------------------------------|------------------------------------------------------------------------------------------------------|-----------------------|-------------|-----------------|--------------------------|-------------|-----------------|
|             |                                                                                                                                                                                                       |                                                                                                      | Beta                  | SE          | P-value         | Beta                     | SE          | P-value         |
| Module 35   | LDLR, SC5DL, FADS1, CYP51A1, FDFT1, SCD, MYLIP, SC4MOL, HMGCS1, SQLE, ABCG1, ABCA1                                                                                                                    | Steroid metabolism (FDR = 4.23E-11; LDLR, CYP51A1, SQLE, HMGCS1, ABCA1, ABCG1, SC5DL, FDFT1, SC4MOL) | <b>0.08</b>           | <b>0.02</b> | <b>2.31E-04</b> | <b>0.25</b>              | <b>0.07</b> | <b>3.34E-04</b> |
| Module 39   | PIM1, GAS6, MTHFD2, FCGR1B, FCGR1A, FCGR1C, CASP5                                                                                                                                                     | Phagosome formation (FDR =1.32E-02; FCGR1C, FCGR1A, FCGR1B )                                         | 0.06                  | 0.02        | 4.62E-03        | <b>0.24</b>              | <b>0.07</b> | <b>5.26E-04</b> |
| Module 23   | OSBPL8, CCDC109A, CX3CR1, CBARA1, RRAGD, RAPH1, FAM129A, UBE2J1, HDAC9, EPS8, ITGB5, C1ORF24, LPCAT3, CDK6, ELMO2, TPST2, SORT1, KCNMB4, PLA2G15, P2RX4, SNTB1, SLITRK4, PDGFC, MYD88, MPHOSPH6, TCF4 | Migration of cells (FDR = 3.96E-02; ITGB5, EPS8, CX3CR1, MYD88, CDK6, OSBPL8, ELMO2, TCF4, SORT1)    | 0.05                  | 0.02        | 0.02            | <b>0.22</b>              | <b>0.07</b> | <b>1.63E-03</b> |

\*Enrichment from IPA Ingenuity, module genes compared to a background of all genes with detectable expression;

†Module eigengene associations  $FDR\_BH \leq 0.05$  shown in bold.

**Supplementary Table 4.** Monocyte CpGs with Methylation Associated with Atherosclerosis (FDR ≤ 0.10)

| CpG methylation characteristics |     |                   |            |       |      |           |                                           | Methylation ~ Carotid Plaque (N=1,176) |      |          |          | Methylation ~ CAC (N=1,203) |      |          |      |
|---------------------------------|-----|-------------------|------------|-------|------|-----------|-------------------------------------------|----------------------------------------|------|----------|----------|-----------------------------|------|----------|------|
| CpG ID                          | Chr | Location          | CpG island | *TFBS | †DMR | ‡DNase HS | ‡Predicted state in B cell line (GM12878) | Beta                                   | SE   | P-value  | FDR      | Beta                        | SE   | P-value  | FDR  |
| cg06126421                      | 6   | Intergenic        |            | 1     |      | 1         | 13 Heterochrom/lo                         | -0.14                                  | 0.02 | 2.00E-10 | 8.91E-05 | -0.19                       | 0.07 | 8.33E-03 |      |
| cg05575921                      | 5   | AHRR (Body)       | Shore      | 1     |      |           | 4 Strong Enhancer                         | -0.13                                  | 0.02 | 4.05E-10 | 9.01E-05 | -0.25                       | 0.07 | 3.40E-04 |      |
| cg21566642                      | 2   | Intergenic        | Island     |       | DMR  |           | 12 Repressed                              | -0.12                                  | 0.02 | 3.99E-09 | 5.92E-04 | -0.27                       | 0.07 | 1.44E-04 |      |
| cg05951221                      | 2   | Intergenic        | Island     |       |      | 1         | 12 Repressed                              | -0.12                                  | 0.02 | 2.15E-08 | 2.40E-03 | -0.26                       | 0.07 | 1.34E-04 |      |
| cg06644428                      | 2   | Intergenic        | Island     |       | DMR  |           | 12 Repressed                              | -0.11                                  | 0.02 | 6.44E-08 | 5.73E-03 | -0.26                       | 0.07 | 2.04E-04 |      |
| cg05119988                      | 4   | SC4MOL (5'UTR)    | Shelf      | 1     |      |           | 2 Weak Promoter                           | -0.08                                  | 0.02 | 1.63E-04 |          | -0.36                       | 0.07 | 9.83E-08 | 0.03 |
| cg19572487                      | 17  | RARA (5'UTR)      | Shore      | 1     |      | 1         | 1 Active Promoter                         | -0.11                                  | 0.02 | 9.89E-08 | 7.33E-03 | -0.20                       | 0.07 | 4.89E-03 |      |
| cg23661483                      | 19  | ILVBL (Body)      | Shelf      |       |      |           | 11 Weak Txn                               | 0.11                                   | 0.02 | 6.09E-07 | 0.02     | 0.38                        | 0.07 | 1.28E-07 | 0.03 |
| cg14753356                      | 6   | Intergenic        |            | 1     |      | 1         | 13 Heterochrom/lo                         | -0.11                                  | 0.02 | 1.43E-07 | 9.09E-03 | -0.15                       | 0.07 | 0.04     |      |
| cg09935388                      | 1   | GFI1 (Body)       | Island     |       | CDMR | 1         | 11 Weak Txn                               | -0.11                                  | 0.02 | 1.77E-07 | 9.84E-03 | -0.17                       | 0.07 | 0.01     |      |
| cg05546038                      | 16  | NOL3 (TSS1500)    | Shore      | 1     |      |           | 11 Weak Txn                               | 0.11                                   | 0.02 | 2.05E-07 | 0.01     | 0.16                        | 0.07 | 0.03     |      |
| cg10549018                      | 10  | TLL2 (Body)       |            |       |      |           | 7 Weak Enhancer                           | 0.06                                   | 0.02 | 5.08E-03 |          | 0.36                        | 0.07 | 2.28E-07 | 0.03 |
| cg21161138                      | 5   | AHRR (Body)       |            | 1     |      |           | 5 Strong Enhancer                         | -0.11                                  | 0.02 | 2.78E-07 | 0.01     | -0.21                       | 0.07 | 2.86E-03 |      |
| cg15342087                      | 6   | Intergenic        |            | 1     |      | 1         | 13 Heterochrom/lo                         | -0.11                                  | 0.02 | 2.79E-07 | 0.01     | -0.06                       | 0.07 | 0.36     |      |
| cg03295554                      | 11  | ETS1 (Body)       | Shelf      | 1     |      | 1         | 5 Strong Enhancer                         | -0.10                                  | 0.02 | 3.10E-07 | 0.01     | -0.20                       | 0.07 | 3.22E-03 |      |
| cg14026106                      | 10  | MARCH8 (Body)     |            | 1     |      | 1         | 13 Heterochrom/lo                         | -0.06                                  | 0.02 | 3.19E-03 |          | -0.36                       | 0.07 | 3.26E-07 | 0.03 |
| cg24859433                      | 6   | Intergenic        |            | 1     |      | 1         | 13 Heterochrom/lo                         | -0.11                                  | 0.02 | 3.57E-07 | 0.01     | -0.10                       | 0.07 | 0.18     |      |
| cg00889709                      | 8   | FAM110B (5'UTR)   |            |       |      | 1         | 13 Heterochrom/lo                         | 0.03                                   | 0.02 | 0.10     |          | 0.36                        | 0.07 | 3.83E-07 | 0.03 |
| cg25953130                      | 10  | ARID5B (Body)     |            | 1     |      | 1         | 5 Strong Enhancer                         | -0.11                                  | 0.02 | 4.31E-07 | 0.01     | -0.28                       | 0.07 | 6.80E-05 |      |
| cg00021275                      | 2   | Intergenic        | Shelf      |       |      | 1         | 9 Txn Transition                          | 0.11                                   | 0.02 | 4.39E-07 | 0.01     | 0.23                        | 0.08 | 2.05E-03 |      |
| cg24247537                      | 11  | PTDSS2 (Body)     | Shore      |       |      |           | 4 Strong Enhancer                         | 0.06                                   | 0.02 | 0.01     |          | 0.37                        | 0.07 | 4.84E-07 | 0.03 |
| cg18857467                      | 1   | HDAC1 (Body)      |            | 1     |      | 1         | 4 Strong Enhancer                         | -0.07                                  | 0.02 | 2.01E-03 |          | -0.35                       | 0.07 | 4.89E-07 | 0.03 |
| cg16107001                      | 4   | C4orf48 (TSS1500) | Island     |       |      |           | 2 Weak Promoter                           | 0.10                                   | 0.02 | 5.00E-07 | 0.01     | 0.10                        | 0.07 | 0.13     |      |
| cg21271420                      | 6   | Intergenic        |            |       |      |           | 13 Heterochrom/lo                         | -0.11                                  | 0.02 | 6.49E-07 | 0.02     | -0.05                       | 0.07 | 0.50     |      |
| cg08867471                      | 5   | Intergenic        |            | 1     |      | 1         | 13 Heterochrom/lo                         | -0.12                                  | 0.02 | 9.09E-07 | 0.02     | -0.08                       | 0.08 | 0.31     |      |
| cg03636183                      | 19  | F2RL3 (Body)      | Shore      | 1     |      | 1         | 6 Weak Enhancer                           | -0.10                                  | 0.02 | 9.17E-07 | 0.02     | -0.16                       | 0.07 | 0.02     |      |
| cg01940273                      | 2   | Intergenic        | Island     | 1     |      |           | 12 Repressed                              | -0.10                                  | 0.02 | 9.21E-07 | 0.02     | -0.22                       | 0.07 | 1.56E-03 |      |
| cg16663980                      | 1   | MNDA (5'UTR)      |            |       |      |           | 11 Weak Txn                               | 0.07                                   | 0.02 | 1.33E-03 |          | 0.34                        | 0.07 | 1.04E-06 | 0.06 |
| cg04761231                      | 9   | RPL35 (Body)      | Island     | 1     |      | 1         | 1 Active Promoter                         | -0.11                                  | 0.02 | 1.23E-06 | 0.02     | -0.27                       | 0.08 | 3.09E-04 |      |
| cg19266329                      | 1   | Intergenic        |            | 1     |      | 1         | 4 Strong Enhancer                         | -0.10                                  | 0.02 | 1.34E-06 | 0.03     | -0.18                       | 0.07 | 0.01     |      |
| cg15501219                      | 3   | Intergenic        | Shelf      |       |      |           | 13 Heterochrom/lo                         | 0.13                                   | 0.03 | 1.67E-06 | 0.03     | 0.42                        | 0.09 | 5.15E-06 |      |
| cg24574691                      | 11  | Intergenic        |            |       |      |           | 13 Heterochrom/lo                         | 0.10                                   | 0.02 | 1.83E-06 | 0.03     | 0.17                        | 0.07 | 0.01     |      |
| cg00834988                      | 7   | AUTS2 (Body)      | Shore      |       |      |           | 13 Heterochrom/lo                         | 0.10                                   | 0.02 | 1.84E-06 | 0.03     | 0.29                        | 0.07 | 4.65E-05 |      |
| cg02160023                      | 16  | CLCN7 (3'UTR)     | Shore      |       |      |           | 13 Heterochrom/lo                         | 0.02                                   | 0.02 | 0.42     |          | 0.33                        | 0.07 | 2.01E-06 | 0.10 |
| cg24420089                      | 11  | PTDSS2 (Body)     | Shore      |       |      |           | 4 Strong Enhancer                         | 0.05                                   | 0.02 | 0.03     |          | 0.34                        | 0.07 | 2.27E-06 | 0.10 |

| CpG methylation characteristics |     |                   |            |       |      |           |                                           | Methylation ~ Carotid Plaque (N=1,176) |      |          |      | Methylation ~ CAC (N=1,203) |       |          |      |
|---------------------------------|-----|-------------------|------------|-------|------|-----------|-------------------------------------------|----------------------------------------|------|----------|------|-----------------------------|-------|----------|------|
| CpG ID                          | Chr | Location          | CpG island | *TFBS | †DMR | ‡DNase HS | ‡Predicted state in B cell line (GM12878) | Beta                                   | SE   | P-value  | FDR  | Beta                        | SE    | P-value  | FDR  |
| cg13200854                      | 4   | MMRN1 (Body)      |            |       |      | 1         | 13 Heterochrom/lo                         | -0.10                                  | 0.02 | 2.27E-06 | 0.04 | -0.24                       | 0.07  | 7.39E-04 |      |
| cg07033253                      | 7   | SRRM3 (Body)      | Shore      |       |      |           | 13 Heterochrom/lo                         | -0.09                                  | 0.02 | 1.05E-05 | 0.09 | -0.33                       | 0.07  | 2.44E-06 | 0.10 |
| cg05246522                      | 17  | KSR1 (TSS200)     |            | 1     |      | 1         | 4 Strong Enhancer                         | -0.07                                  | 0.02 | 6.58E-04 |      | -0.35                       | 0.07  | 2.70E-06 | 0.10 |
| cg09076584                      | 17  | FLJ25006 (TSS200) |            |       |      | 1         | 10 Txn Elongation                         | 0.08                                   | 0.02 | 1.24E-04 |      | 0.33                        | 0.07  | 2.74E-06 | 0.10 |
| cg08958747                      | 16  | RAB26 (Body)      | Shelf      | 1     |      | 1         | 4 Strong Enhancer                         | -0.10                                  | 0.02 | 2.83E-06 | 0.04 | -0.17                       | 0.07  | 0.02     |      |
| cg23848152                      | 1   | NOTCH2NL (5'UTR)  | Shore      |       |      |           | 3 Poised Promoter                         | -0.10                                  | 0.02 | 2.93E-06 | 0.04 | -0.15                       | 0.07  | 0.03     |      |
| cg12798040                      | 14  | XRCC3 (Body)      |            | 1     |      | 1         | 10 Txn Elongation                         | 0.07                                   | 0.02 | 7.47E-04 |      | 0.32                        | 0.07  | 3.29E-06 | 0.10 |
| cg13913475                      | X   | Intergenic        | Shore      | 1     |      | 1         | 8 Insulator                               | -0.05                                  | 0.02 | 0.01     |      | -0.32                       | 0.07  | 3.31E-06 | 0.10 |
| cg13699363                      | 3   | EDEM1 (TSS1500)   | Island     | 1     |      | 1         | 1 Active Promoter                         | -0.04                                  | 0.02 | 0.04     |      | -0.32                       | 0.07  | 3.62E-06 | 0.10 |
| cg24736734                      | 5   | Intergenic        |            | 1     |      | 1         | 7 Weak Enhancer                           | -0.10                                  | 0.02 | 3.66E-06 | 0.05 | -0.21                       | 0.07  | 4.02E-03 |      |
| cg01763719                      | 2   | Intergenic        |            |       |      |           | 13 Heterochrom/lo                         | 0.11                                   | 0.02 | 3.70E-06 | 0.05 | 0.22                        | 0.08  | 9.20E-03 |      |
| cg03355101                      | 19  | Intergenic        |            | 1     | DMR  |           | 2 Weak Promoter                           | -0.09                                  | 0.02 | 3.99E-06 | 0.06 | 0.04                        | 0.07  | 0.59     |      |
| cg10512376                      | 4   | EMCN (TSS1500)    |            |       |      |           | 13 Heterochrom/lo                         | -0.10                                  | 0.02 | 5.71E-06 | 0.08 | -0.24                       | 0.07  | 9.98E-04 |      |
| cg22773522                      | 13  | DAOA (TSS1500)    |            |       |      |           | 13 Heterochrom/lo                         | -0.09                                  | 0.02 | 6.19E-06 | 0.08 | -0.08                       | 0.07  | 0.25     |      |
| cg18446336                      | 7   | GNA12 (Body)      |            | 1     |      | 1         | 11 Weak Txn                               | -0.09                                  | 0.02 | 6.45E-06 | 0.08 | -0.07                       | 0.07  | 0.31     |      |
| cg10508317                      | 17  | SOCS3 (Body)      | Island     | 1     | DMR  | 1         | 3 Poised Promoter                         | -0.10                                  | 0.02 | 6.98E-06 | 0.09 | -0.20                       | 0.07  | 7.12E-03 |      |
| cg00294684                      | 11  | OR52B6 (1stExon)  |            |       |      |           | 13 Heterochrom/lo                         | -0.09                                  | 0.02 | 7.48E-06 | 0.09 | -0.16                       | 0.07  | 0.02     |      |
| cg02475408                      | 7   | Intergenic        | Shore      |       |      |           | 13 Heterochrom/lo                         | -0.09                                  | 0.02 | 7.74E-06 | 0.09 | -0.18                       | 0.07  | 7.67E-03 |      |
| cg05888181                      | 8   | KBTBD11 (3'UTR)   | Shore      |       |      | 1         | 13 Heterochrom/lo                         | 0.11                                   | 0.02 | 7.90E-06 | 0.09 | 0.14                        | 0.08  | 0.09     |      |
| cg20507228                      | 15  | MAN2A2 (Body)     |            |       |      |           | 10 Txn Elongation                         | 0.09                                   | 0.02 | 7.91E-06 | 0.09 | 0.29                        | 0.07  | 3.84E-05 |      |
| cg03738331                      | 4   | HTT (TSS200)      | Island     | 1     |      | 1         | 1 Active Promoter                         | -0.09                                  | 0.02 | 8.24E-06 | 0.09 | -0.12                       | 0.07  | 0.07     |      |
| cg01692968                      | 9   | Intergenic        | Shore      | 1     |      | 1         | 6 Weak Enhancer                           | -0.10                                  | 0.02 | 8.46E-06 | 0.09 | -0.11                       | 0.08  | 0.15     |      |
| cg23840027                      | 1   | EPB41 (5'UTR)     |            |       |      |           | 11 Weak Txn                               | 0.09                                   | 0.02 | 8.49E-06 | 0.09 | 0.15                        | 0.07  | 0.04     |      |
| cg09768249                      | X   | DDX3X (TSS200)    | Island     | 1     |      | 1         | 1 Active Promoter                         | 0.09                                   | 0.02 | 8.50E-06 | 0.09 | 0.003                       | 0.069 | 0.97     |      |
| cg09656152                      | 5   | Intergenic        |            |       |      |           | 13 Heterochrom/lo                         | -0.09                                  | 0.02 | 8.69E-06 | 0.09 | -0.08                       | 0.07  | 0.23     |      |
| cg16661609                      | 19  | LILRB4 (TSS1500)  |            |       |      |           | 5 Strong Enhancer                         | -0.09                                  | 0.02 | 9.47E-06 | 0.09 | -0.13                       | 0.07  | 0.08     |      |
| cg03072035                      | 10  | Intergenic        | Shelf      |       |      | 1         | 13 Heterochrom/lo                         | 0.10                                   | 0.02 | 9.55E-06 | 0.09 | 0.17                        | 0.08  | 0.02     |      |
| cg01110839                      | 11  | SLC39A13 (3'UTR)  |            | 1     |      | 1         | 11 Weak Txn                               | 0.10                                   | 0.02 | 1.04E-05 | 0.09 | 0.23                        | 0.07  | 1.63E-03 |      |
| cg08170227                      | 14  | ACTN1 (Body)      |            | 1     |      | 1         | 11 Weak Txn                               | -0.09                                  | 0.02 | 1.05E-05 | 0.09 | -0.21                       | 0.07  | 2.14E-03 |      |
| cg00913954                      | 1   | STK40 (TSS1500)   | Shore      | 1     | RDMR | 1         | 4 Strong Enhancer                         | 0.11                                   | 0.02 | 1.05E-05 | 0.09 | 0.14                        | 0.08  | 0.08     |      |
| cg19979108                      | 5   | SH3PXD2B (Body)   |            | 1     |      |           | 12 Repressed                              | -0.10                                  | 0.02 | 1.11E-05 | 0.09 | -0.18                       | 0.07  | 0.02     |      |
| cg05249393                      | 19  | LDLR (TSS200)     | Shore      | 1     |      | 1         | 4 Strong Enhancer                         | -0.09                                  | 0.02 | 1.12E-05 | 0.09 | -0.16                       | 0.07  | 0.02     |      |
| cg15344028                      | 2   | ICOS (5'UTR)      |            |       |      |           | 13 Heterochrom/lo                         | -0.09                                  | 0.02 | 1.13E-05 | 0.09 | -0.13                       | 0.07  | 0.06     |      |
| cg12912426                      | 12  | ATF7IP (5'UTR)    |            |       |      |           | 5 Strong Enhancer                         | -0.09                                  | 0.02 | 1.15E-05 | 0.09 | -0.12                       | 0.07  | 0.08     |      |
| cg05850338                      | 17  | Intergenic        | Shelf      |       |      |           | 13 Heterochrom/lo                         | 0.09                                   | 0.02 | 1.16E-05 | 0.09 | 0.11                        | 0.07  | 0.13     |      |
| cg18561976                      | 2   | ICOS (5'UTR)      |            |       |      | 1         | 13 Heterochrom/lo                         | -0.09                                  | 0.02 | 1.18E-05 | 0.09 | -0.17                       | 0.07  | 0.01     |      |

| CpG methylation characteristics |     |                  |            |       |      |           |                                           | Methylation ~ Carotid Plaque (N=1,176) |      |          |      | Methylation ~ CAC (N=1,203) |      |          |     |
|---------------------------------|-----|------------------|------------|-------|------|-----------|-------------------------------------------|----------------------------------------|------|----------|------|-----------------------------|------|----------|-----|
| CpG ID                          | Chr | Location         | CpG island | *TFBS | †DMR | ‡DNase HS | ‡Predicted state in B cell line (GM12878) | Beta                                   | SE   | P-value  | FDR  | Beta                        | SE   | P-value  | FDR |
| cg03059174                      | 20  | SFRS6 (TSS1500)  | Shore      | 1     |      | 1         | 1 Active Promoter                         | -0.09                                  | 0.02 | 1.18E-05 | 0.09 | -0.10                       | 0.07 | 0.14     |     |
| cg12547807                      | 1   | Intergenic       |            | 1     |      | 1         | 4 Strong Enhancer                         | -0.09                                  | 0.02 | 1.19E-05 | 0.09 | -0.20                       | 0.07 | 3.79E-03 |     |
| cg17038626                      | 12  | CACNA1C (Body)   |            |       |      |           | 12 Repressed                              | -0.09                                  | 0.02 | 1.20E-05 | 0.09 | -0.06                       | 0.07 | 0.36     |     |
| cg26712743                      | 10  | PYROXD2 (Body)   |            | 1     |      | 1         | 4 Strong Enhancer                         | -0.10                                  | 0.02 | 1.22E-05 | 0.09 | -0.24                       | 0.07 | 1.25E-03 |     |
| cg18168448                      | 1   | LRRCS2 (1stExon) |            |       |      |           | 12 Repressed                              | -0.09                                  | 0.02 | 1.27E-05 | 0.09 | -0.17                       | 0.07 | 0.01     |     |
| cg09646173                      | 5   | PDE6A (Body)     |            | 1     |      |           | 13 Heterochrom/lo                         | -0.10                                  | 0.02 | 1.32E-05 | 0.09 | -0.24                       | 0.07 | 1.39E-03 |     |
| cg16006965                      | 3   | GCET2 (TSS1500)  |            | 1     |      | 1         | 4 Strong Enhancer                         | -0.09                                  | 0.02 | 1.34E-05 | 0.09 | -0.07                       | 0.07 | 0.29     |     |
| cg08882503                      | 1   | NPHP4 (Body)     |            |       |      | 1         | 11 Weak Txn                               | -0.09                                  | 0.02 | 1.38E-05 | 0.09 | -0.12                       | 0.07 | 0.08     |     |
| cg16016063                      | 1   | Intergenic       |            |       |      |           | 13 Heterochrom/lo                         | 0.09                                   | 0.02 | 1.40E-05 | 0.09 | 0.15                        | 0.07 | 0.03     |     |
| cg03928367                      | 20  | FER1L4 (Body)    | Shore      |       | CDMR | 1         | 12 Repressed                              | 0.09                                   | 0.02 | 1.45E-05 | 0.10 | 0.11                        | 0.07 | 0.11     |     |
| cg18050903                      | 4   | RASGEF1B (Body)  |            | 1     |      | 1         | 13 Heterochrom/lo                         | -0.09                                  | 0.02 | 1.56E-05 | 0.10 | -0.18                       | 0.07 | 0.01     |     |

Sorted by most significant association (p-value) with carotid plaque or CAC; FDR > 0.10 are left blank

\*TFBS in any cell type from UCSC browser; † DMR: diff methylated region from Illumina (RDMR: reprogramming-specific, CDMR: cancer-specific);

‡DNase HS in any cell type and predicted state from ENCODE.

**Supplementary Table 5.** Race/ethnicity and sex-stratified analysis of CpGs with methylation associated with Atherosclerosis

| Carotid Plaque Score associated CpG methylation (FDR≤0.05): |                   |                          |      |         |                   |      |         |                  |      |         |               |      |         |             |      |         |
|-------------------------------------------------------------|-------------------|--------------------------|------|---------|-------------------|------|---------|------------------|------|---------|---------------|------|---------|-------------|------|---------|
| CpG Methylation                                             |                   | African American (N=259) |      |         | Caucasian (N=530) |      |         | Hispanic (N=370) |      |         | Women (N=601) |      |         | Men (N=558) |      |         |
| CpG ID                                                      | Location          | Beta                     | SE   | P-val   | Beta              | SE   | P-val   | Beta             | SE   | P-val   | Beta          | SE   | P-val   | Beta        | SE   | P-val   |
| cg16107001                                                  | C4orf48 (TSS1500) | 0.10                     | 0.05 | 0.026   | 0.14              | 0.03 | 2.3E-06 | 0.05             | 0.03 | 0.15    | 0.06          | 0.03 | 0.020   | 0.14        | 0.03 | 9.7E-07 |
| cg21271420                                                  | Intergenic        | -0.07                    | 0.04 | 0.10    | -0.12             | 0.03 | 9.4E-05 | -0.09            | 0.04 | 0.029   | -0.09         | 0.03 | 2.2E-03 | -0.12       | 0.03 | 1.6E-04 |
| cg23848152                                                  | NOTCH2NL (5'UTR)  | -0.13                    | 0.05 | 5.4E-03 | -0.09             | 0.03 | 1.2E-03 | -0.07            | 0.03 | 0.061   | -0.05         | 0.03 | 0.065   | -0.15       | 0.03 | 1.6E-06 |
| cg08867471                                                  | Intergenic        | -0.04                    | 0.05 | 0.37    | -0.17             | 0.04 | 2.2E-06 | -0.07            | 0.04 | 0.11    | -0.13         | 0.03 | 7.6E-05 | -0.10       | 0.03 | 5.3E-03 |
| cg05575921                                                  | AHRR (Body)       | -0.05                    | 0.06 | 0.38    | -0.17             | 0.04 | 1.0E-05 | -0.09            | 0.05 | 0.077   | -0.05         | 0.04 | 0.20    | -0.16       | 0.04 | 7.1E-06 |
| cg25953130                                                  | ARID5B (Body)     | -0.08                    | 0.05 | 0.073   | -0.13             | 0.03 | 6.3E-05 | -0.04            | 0.04 | 0.31    | -0.10         | 0.03 | 7.3E-04 | -0.09       | 0.03 | 5.9E-03 |
| cg06126421                                                  | Intergenic        | -0.09                    | 0.06 | 0.10    | -0.14             | 0.03 | 4.4E-05 | -0.05            | 0.04 | 0.19    | -0.06         | 0.03 | 0.080   | -0.16       | 0.03 | 5.8E-06 |
| cg05546038                                                  | NOL3 (TSS1500)    | 0.10                     | 0.04 | 0.022   | 0.11              | 0.03 | 1.2E-03 | 0.09             | 0.04 | 0.014   | 0.08          | 0.03 | 7.7E-03 | 0.11        | 0.03 | 4.0E-04 |
| cg24574691                                                  | Intergenic        | 0.07                     | 0.03 | 0.035   | 0.09              | 0.05 | 0.072   | 0.09             | 0.03 | 9.8E-04 | 0.08          | 0.02 | 1.8E-04 | 0.08        | 0.04 | 0.036   |
| cg09935388                                                  | GFI1 (Body)       | -0.11                    | 0.05 | 0.035   | -0.11             | 0.03 | 1.6E-04 | -0.03            | 0.04 | 0.50    | -0.08         | 0.03 | 9.5E-03 | -0.10       | 0.03 | 1.6E-03 |
| cg01763719                                                  | Intergenic        | 0.13                     | 0.05 | 0.019   | 0.10              | 0.04 | 7.9E-03 | 0.10             | 0.04 | 0.017   | 0.15          | 0.03 | 2.1E-05 | 0.07        | 0.03 | 0.038   |
| cg00021275                                                  | Intergenic        | 0.12                     | 0.06 | 0.032   | 0.09              | 0.03 | 7.7E-03 | 0.10             | 0.04 | 8.7E-03 | 0.11          | 0.03 | 2.4E-04 | 0.07        | 0.03 | 0.025   |
| cg23661483                                                  | ILVBL (Body)      | 0.07                     | 0.05 | 0.13    | 0.06              | 0.03 | 0.058   | 0.12             | 0.04 | 7.7E-04 | 0.11          | 0.03 | 1.7E-04 | 0.07        | 0.03 | 0.022   |
| cg08958747                                                  | RAB26 (Body)      | -0.10                    | 0.05 | 0.049   | -0.09             | 0.03 | 8.0E-03 | -0.08            | 0.04 | 0.039   | -0.08         | 0.03 | 9.9E-03 | -0.10       | 0.03 | 1.5E-03 |
| cg13200854                                                  | MMRN1 (Body)      | -0.08                    | 0.05 | 0.11    | -0.11             | 0.03 | 1.4E-04 | -0.06            | 0.04 | 0.083   | -0.04         | 0.03 | 0.14    | -0.13       | 0.03 | 1.2E-05 |
| cg24736734                                                  | Intergenic        | -0.14                    | 0.05 | 3.1E-03 | -0.07             | 0.03 | 0.023   | -0.11            | 0.04 | 7.6E-03 | -0.11         | 0.03 | 9.3E-05 | -0.07       | 0.03 | 0.024   |
| cg19572487                                                  | RARA (5'UTR)      | -0.04                    | 0.05 | 0.46    | -0.12             | 0.03 | 1.9E-04 | -0.06            | 0.04 | 0.14    | -0.05         | 0.03 | 0.11    | -0.12       | 0.03 | 7.6E-05 |
| cg03295554                                                  | ETS1 (Body)       | -0.08                    | 0.04 | 0.061   | -0.09             | 0.03 | 2.6E-03 | -0.08            | 0.04 | 0.028   | -0.10         | 0.03 | 3.1E-04 | -0.06       | 0.03 | 0.045   |
| cg19266329                                                  | Intergenic        | -0.14                    | 0.05 | 3.2E-03 | -0.10             | 0.03 | 1.4E-03 | -0.02            | 0.04 | 0.68    | -0.07         | 0.03 | 0.015   | -0.10       | 0.03 | 1.3E-03 |
| cg04761231                                                  | RPL35 (Body)      | -0.06                    | 0.05 | 0.22    | -0.12             | 0.03 | 2.2E-04 | -0.05            | 0.04 | 0.27    | -0.07         | 0.03 | 0.016   | -0.11       | 0.03 | 1.4E-03 |
| cg21566642                                                  | Intergenic        | -0.07                    | 0.06 | 0.20    | -0.11             | 0.03 | 2.1E-03 | -0.06            | 0.04 | 0.16    | -0.06         | 0.03 | 0.067   | -0.12       | 0.03 | 5.0E-04 |
| cg15501219                                                  | Intergenic        | 0.13                     | 0.06 | 0.037   | 0.06              | 0.04 | 0.13    | 0.13             | 0.04 | 4.0E-03 | 0.11          | 0.04 | 7.0E-03 | 0.10        | 0.04 | 4.6E-03 |
| cg15342087                                                  | Intergenic        | -0.09                    | 0.04 | 0.039   | -0.09             | 0.03 | 9.9E-03 | -0.03            | 0.04 | 0.42    | -0.07         | 0.03 | 0.035   | -0.09       | 0.03 | 3.7E-03 |
| cg00834988                                                  | AUTS2 (Body)      | 0.05                     | 0.04 | 0.24    | 0.06              | 0.03 | 0.043   | 0.10             | 0.03 | 2.8E-03 | 0.08          | 0.03 | 6.4E-03 | 0.07        | 0.03 | 0.024   |
| cg24859433                                                  | Intergenic        | -0.08                    | 0.05 | 0.077   | -0.09             | 0.03 | 8.0E-03 | -0.02            | 0.04 | 0.62    | -0.07         | 0.03 | 0.029   | -0.09       | 0.03 | 7.5E-03 |
| cg14753356                                                  | Intergenic        | -0.06                    | 0.05 | 0.28    | -0.11             | 0.03 | 1.5E-03 | -0.04            | 0.04 | 0.32    | -0.03         | 0.03 | 0.42    | -0.13       | 0.03 | 5.9E-05 |
| cg21161138                                                  | AHRR (Body)       | -0.13                    | 0.05 | 8.8E-03 | -0.09             | 0.03 | 9.9E-03 | -0.03            | 0.04 | 0.54    | -0.05         | 0.03 | 0.13    | -0.11       | 0.03 | 1.4E-03 |
| cg05951221                                                  | Intergenic        | -0.04                    | 0.06 | 0.48    | -0.09             | 0.03 | 5.9E-03 | -0.05            | 0.04 | 0.23    | -0.06         | 0.03 | 0.077   | -0.10       | 0.03 | 5.9E-03 |
| cg06644428                                                  | Intergenic        | -0.07                    | 0.05 | 0.15    | -0.06             | 0.03 | 0.063   | -0.07            | 0.04 | 0.086   | -0.04         | 0.03 | 0.25    | -0.10       | 0.03 | 1.4E-03 |
| cg03636183                                                  | F2RL3 (Body)      | 0.00                     | 0.04 | 0.95    | -0.13             | 0.04 | 4.1E-04 | -0.03            | 0.04 | 0.40    | -0.03         | 0.03 | 0.35    | -0.10       | 0.03 | 1.2E-03 |
| cg01940273                                                  | Intergenic        | -0.08                    | 0.05 | 0.16    | -0.09             | 0.03 | 9.5E-03 | -0.02            | 0.04 | 0.59    | -0.04         | 0.03 | 0.27    | -0.10       | 0.03 | 2.8E-03 |

| Coronary artery calcium associated CpG methylation (FDR≤0.05): |                 |                             |      |         |                      |      |         |                     |      |         |                  |      |         |                |      |         |
|----------------------------------------------------------------|-----------------|-----------------------------|------|---------|----------------------|------|---------|---------------------|------|---------|------------------|------|---------|----------------|------|---------|
| CpG ID                                                         | Location        | African American<br>(N=258) |      |         | Caucasian<br>(N=542) |      |         | Hispanic<br>(N=385) |      |         | Women<br>(N=611) |      |         | Men<br>(N=574) |      |         |
|                                                                |                 | Beta                        | SE   | P-val   | Beta                 | SE   | P-val   | Beta                | SE   | P-val   | Beta             | SE   | P-val   | Beta           | SE   | P-val   |
| cg18857467                                                     | HDAC1 (Body)    | -0.25                       | 0.17 | 0.15    | -0.31                | 0.09 | 4.6E-04 | -0.18               | 0.13 | 0.16    | -0.26            | 0.09 | 4.0E-03 | -0.23          | 0.10 | 0.022   |
| cg05119988                                                     | SC4MOL (5'UTR)  | -0.40                       | 0.14 | 5.9E-03 | -0.23                | 0.10 | 0.016   | -0.07               | 0.13 | 0.56    | -0.17            | 0.09 | 0.054   | -0.21          | 0.10 | 0.037   |
| cg00889709                                                     | FAM110B (5'UTR) | 0.19                        | 0.13 | 0.15    | 0.21                 | 0.11 | 0.062   | 0.35                | 0.12 | 3.5E-03 | 0.17             | 0.10 | 0.080   | 0.30           | 0.10 | 2.8E-03 |
| cg14026106                                                     | 42071 (Body)    | -0.22                       | 0.12 | 0.076   | -0.25                | 0.11 | 0.021   | -0.40               | 0.14 | 4.4E-03 | -0.20            | 0.09 | 0.035   | -0.30          | 0.10 | 4.1E-03 |
| cg10549018                                                     | TLL2 (Body)     | 0.20                        | 0.15 | 0.20    | 0.26                 | 0.10 | 0.011   | 0.42                | 0.12 | 3.7E-04 | 0.35             | 0.09 | 1.5E-04 | 0.26           | 0.10 | 0.011   |
| cg24247537                                                     | PTDSS2 (Body)   | 0.47                        | 0.14 | 1.3E-03 | 0.22                 | 0.11 | 0.039   | 0.34                | 0.13 | 8.3E-03 | 0.44             | 0.10 | 6.7E-06 | 0.18           | 0.11 | 0.084   |
| cg23661483                                                     | ILVBL (Body)    | 0.36                        | 0.16 | 0.029   | 0.23                 | 0.10 | 0.021   | 0.36                | 0.13 | 4.9E-03 | 0.33             | 0.10 | 5.5E-04 | 0.27           | 0.10 | 8.7E-03 |

Sorted by most significant association (p-value) with carotid plaque burden or CAC



**Supplementary Table 6. DNA methylation associated with atherosclerosis and cis-gene expression**

| CpG methylation characteristics |            |                 |                                  |                  |                                       | CpG methylation ~ Cis-gene expression<br>(N=1,264) |       |         |         | mRNA expression ~ Carotid Plaque Score<br>(N=1,181) |      |                |         | mRNA expression ~ CAC<br>(N=1,208) |      |                |       |
|---------------------------------|------------|-----------------|----------------------------------|------------------|---------------------------------------|----------------------------------------------------|-------|---------|---------|-----------------------------------------------------|------|----------------|---------|------------------------------------|------|----------------|-------|
| CpG Illumina ID                 | chromosome | Location        | CD14+ in silico predicted state* | CD14+ DNase HS † | ~ Carotid plaque (CP) or CAC FDR<0.05 | Gene                                               | corr‡ | P-value | FDR     | Beta                                                | SE   | P-value        | FDR     | Beta                               | SE   | P-value        | FDR   |
| cg25953130                      | 10         | ARID5B (Body)   | 5                                | 1                | CP                                    | <b>ARID5B</b>                                      | -0.21 | 1.3E-08 | 5.7E-06 | 0.12                                                | 0.02 | <b>6.3E-08</b> | 1.1E-03 | 0.32                               | 0.08 | <b>2.5E-05</b> | 0.034 |
| cg05119988                      | 4          | SC4MOL (5'UTR)  | 2                                |                  | CAC                                   | <b>SC4MOL</b>                                      | -0.17 | 1.2E-10 | 7.3E-08 | 0.07                                                | 0.02 | <b>1.4E-03</b> | 0.31    | 0.17                               | 0.07 | <b>0.014</b>   | 0.31  |
| cg05546038                      | 16         | NOL3 (TSS1500)  | 6                                | 1                | CP                                    | <b>DPEP2</b>                                       | -0.21 | 1.5E-11 | 1.0E-08 | -0.06                                               | 0.02 | <b>7.6E-03</b> | 0.41    | -0.01                              | 0.07 | <b>0.91</b>    | 0.82  |
| cg05546038                      | 16         | NOL3 (TSS1500)  | 6                                | 1                | CP                                    | <b>ZDHHC1</b>                                      | -0.19 | 1.5E-10 | 9.1E-08 | -0.05                                               | 0.02 | <b>0.030</b>   | 0.50    | -0.03                              | 0.07 | <b>0.67</b>    | 0.77  |
| cg05546038                      | 16         | NOL3 (TSS1500)  | 6                                | 1                | CP                                    | <b>ATP6V0D1</b>                                    | 0.08  | 2.4E-06 | 6.5E-04 | 0.03                                                | 0.02 | <b>0.12</b>    | 0.64    | 0.04                               | 0.07 | <b>0.63</b>    | 0.76  |
| cg05546038                      | 16         | NOL3 (TSS1500)  | 6                                | 1                | CP                                    | <b>NOL3</b>                                        | -0.18 | 2.2E-09 | 1.1E-06 | -0.01                                               | 0.02 | <b>0.53</b>    | 0.86    | 0.05                               | 0.07 | <b>0.49</b>    | 0.71  |
| cg05546038                      | 16         | NOL3 (TSS1500)  | 6                                | 1                | CP                                    | <b>DYNC1LI2</b>                                    | -0.12 | 1.6E-06 | 4.4E-04 | -0.01                                               | 0.02 | <b>0.75</b>    | 0.90    | 0.01                               | 0.07 | <b>0.91</b>    | 0.82  |
| cg24736734                      | 5          |                 | 2                                |                  | CP                                    | <b>PAM</b>                                         | -0.13 | 1.2E-08 | 5.1E-06 | 0.04                                                | 0.02 | <b>0.066</b>   | 0.56    | 0.09                               | 0.07 | <b>0.19</b>    | 0.57  |
| cg00889709                      | 8          | FAM110B (5'UTR) | 3                                | 1                | CAC                                   | <b>FAM110B</b>                                     | -0.14 | 3.8E-08 | 1.5E-05 | -0.01                                               | 0.02 | <b>0.66</b>    | 0.89    | -0.02                              | 0.07 | <b>0.81</b>    | 0.80  |

Table includes CpGs with significant (FDR<0.05) associations between CD14+ CpG methylation and atherosclerosis traits carotid plaque or coronary artery calcium (CAC), and *cis* ( $\pm 1$  MB) gene expression profiles (in CD14+ samples from MESA, FDR<0.001)

\*States predicted using ChromHMM with CD14+ histone data from BLUEPRINT; state annotations are 1: transcribed, 2: heterochromatin/low abundance, 3: weak/poised enhancer, 4: strong enhancer, 5: active promoter, 6: weak promoter

† DNase hypersensitive sites in a CD14+ sample from BLUEPRINT

‡correlation between methylation and *cis* ( $\pm 1$ MB) mRNA expression profiles

**Supplementary Table 7.** Atherosclerosis-associated gene expression in monocytes associations with CVD risk factors\*

| Gene            | ~ Carotid plaque (CP) or CAC FDR<0.05 | Beta direction (+/-) or P-val | Age           | Sex (male)    | Race (Black)  | Race (Hispanic) | Current smoker | BMI           | HDL cholesterol | Hypertension  | Diabetes      |
|-----------------|---------------------------------------|-------------------------------|---------------|---------------|---------------|-----------------|----------------|---------------|-----------------|---------------|---------------|
| <b>CACNA2D3</b> | CAC                                   | + -<br>P-val                  | -<br>1.81E-10 |               | -<br>7.75E-25 | -<br>3.32E-15   |                | -<br>8.47E-12 | +<br>5.33E-04   | -<br>4.96E-05 | -<br>5.55E-05 |
| <b>ARID5B</b>   | CP, CAC                               | + -<br>P-val                  | +<br>2.06E-13 | +<br>4.39E-02 | +<br>2.89E-06 | +<br>8.96E-04   | +<br>4.18E-02  | +<br>1.67E-08 | -<br>6.86E-06   | +<br>7.20E-03 | +<br>3.43E-05 |
| <b>PDLIM7</b>   | CP, CAC                               | + -<br>P-val                  |               | -<br>6.85E-04 |               | +<br>1.19E-02   | +<br>1.40E-03  | +<br>9.14E-14 | -<br>1.46E-08   | +<br>5.02E-03 | +<br>2.94E-04 |
| <i>LILRB4</i>   | CAC                                   | + -<br>P-val                  |               | -<br>4.32E-07 |               | +<br>1.13E-03   |                |               | -<br>4.84E-02   | +<br>6.38E-03 |               |
| <i>P2RX4</i>    | CAC                                   | + -<br>P-val                  |               | -<br>8.79E-03 | +<br>5.50E-10 | +<br>2.36E-06   |                | +<br>1.14E-03 | -<br>3.05E-02   | +<br>2.37E-02 | +<br>8.01E-04 |
| <i>FAM168B</i>  | CAC                                   | + -<br>P-val                  |               | +<br>1.94E-09 |               |                 |                | -<br>2.94E-02 |                 |               |               |
| <i>ADM</i>      | CAC                                   | + -<br>P-val                  |               | -<br>1.04E-13 | +<br>4.97E-06 | +<br>1.11E-03   |                | +<br>1.12E-08 | -<br>9.21E-03   | +<br>3.11E-02 |               |
| <i>IARS</i>     | CAC                                   | + -<br>P-val                  | -<br>2.60E-04 | +<br>1.47E-11 |               | -<br>3.52E-03   |                | -<br>7.61E-06 | +<br>2.78E-02   | -<br>4.45E-02 | -<br>1.01E-02 |

\* Adjusting for demographic variables; sorted by most significant association with carotid plaque score or CAC; non-significant ( $p \geq 0.05$ ) associations are left blank; three genes bolded had genome-wide FDR<0.05 for a direction of association with the majority of CVD risk factors similar to those expected based on the mRNA expression association with atherosclerosis and atherosclerosis associations with risk factors; LDL cholesterol was not associated with any atherosclerosis-associated gene expression.

**Supplementary Table 8.** Atherosclerosis-associated CpG methylation in monocytes associations with CVD risk factors\*

| CpG Illumina ID and nearby gene location | ~ Carotid Plaque (CP) or CAC (FDR≤0.05) | Beta direction (+/-) or P-value | Age           | Sex (male)     | Race (Black)  | Race (Hispanic) | Current smoker | BMI           | HDL cholesterol | Hypertension  | Diabetic      |
|------------------------------------------|-----------------------------------------|---------------------------------|---------------|----------------|---------------|-----------------|----------------|---------------|-----------------|---------------|---------------|
| cg06126421<br>Intergenic                 | CP                                      | + -<br>P-val                    | -<br>8.51E-12 | -<br>2.67E-14  |               | +<br>4.83E-08   | -<br>1.47E-42  |               |                 |               |               |
| cg05575921<br>AHRR (Body)                | CP                                      | + -<br>P-val                    |               | -<br>1.18E-11  | -<br>2.26E-02 | +<br>4.50E-02   | -<br>1.59E-110 | +<br>6.23E-03 |                 |               |               |
| cg21566642<br>Intergenic                 | CP                                      | + -<br>P-val                    | -<br>2.29E-02 | -<br>1.61E-07  |               | +<br>1.24E-03   | -<br>1.74E-74  |               |                 |               |               |
| cg05951221<br>Intergenic                 | CP                                      | + -<br>P-val                    |               | -<br>2.47E-04  |               |                 | -<br>5.99E-71  |               |                 |               |               |
| cg06644428<br>Intergenic                 | CP                                      | + -<br>P-val                    | +<br>2.76E-02 |                |               |                 | -<br>4.07E-30  |               |                 |               |               |
| cg05119988<br>SC4MOL (5'UTR)             | CAC                                     | + -<br>P-val                    |               |                |               |                 | -<br>2.64E-02  | -<br>1.09E-04 | +<br>1.09E-06   | -<br>4.99E-03 | -<br>1.27E-09 |
| cg19572487<br>RARA (5'UTR)               | CP                                      | + -<br>P-val                    | -<br>7.24E-06 | -<br>7.28E-06  | +<br>5.59E-04 | +<br>2.01E-05   | -<br>1.20E-25  |               |                 |               |               |
| cg23661483<br>ILVBL (Body)               | CP, CAC                                 | + -<br>P-val                    | +<br>2.78E-09 |                | -<br>1.30E-03 | -<br>2.49E-07   | +<br>3.60E-04  |               |                 |               | +<br>2.76E-03 |
| cg14753356<br>Intergenic                 | CP                                      | + -<br>P-val                    | -<br>5.08E-12 | -<br>3.86E-06  |               | +<br>1.09E-04   | -<br>8.09E-32  |               |                 |               |               |
| cg09935388<br>GFI1 (Body)                | CP                                      | + -<br>P-val                    |               |                |               | +<br>2.71E-03   | -<br>1.84E-40  |               |                 |               |               |
| cg05546038<br>NOL3 (TSS1500)             | CP                                      | + -<br>P-val                    |               | +<br>9.11E-08  | -<br>4.96E-04 |                 | +<br>1.59E-08  |               |                 |               |               |
| cg10549018<br>TLL2 (Body)                | CAC                                     | + -<br>P-val                    | +<br>2.09E-10 | +<br>8.23E-06  | -<br>2.92E-04 |                 | +<br>2.03E-03  |               |                 |               |               |
| cg21161138<br>AHRR (Body)                | CP                                      | + -<br>P-val                    |               | -<br>4.20E-04  |               | +<br>8.06E-04   | -<br>3.01E-59  | +<br>9.39E-03 |                 |               |               |
| cg15342087<br>Intergenic                 | CP                                      | + -<br>P-val                    | -<br>2.35E-06 | -<br>1.74E-06  | -<br>3.70E-05 |                 | -<br>3.21E-40  |               |                 |               |               |
| cg03295554<br>ETS1 (Body)                | CP                                      | + -<br>P-val                    |               |                |               | +<br>3.50E-02   | -<br>1.54E-09  | -<br>4.72E-03 |                 | -<br>5.11E-03 | -<br>1.99E-03 |
| cg14026106<br>MARCH8 (Body)              | CAC                                     | + -<br>P-val                    | -<br>1.66E-30 |                |               |                 |                |               |                 | -<br>6.84E-03 |               |
| cg24859433<br>Intergenic                 | CP                                      | + -<br>P-val                    | -<br>1.26E-06 | -<br>1.32E-10  | -<br>1.63E-05 |                 | -<br>5.88E-34  |               |                 |               | -<br>3.66E-02 |
| cg00889709<br>FAM110B (5'UTR)            | CAC                                     | + -<br>P-val                    | +<br>1.36E-03 | +<br>6.08E-04  | -<br>4.11E-15 |                 | +<br>3.69E-02  | +<br>7.34E-07 | -<br>2.27E-03   | +<br>2.20E-02 | +<br>4.10E-07 |
| cg25953130<br>ARID5B (Body)              | CP                                      | + -<br>P-val                    | -<br>3.33E-11 | +<br>1.14E-06  | +<br>1.10E-04 | -<br>2.25E-02   | -<br>7.19E-07  |               | +<br>3.91E-03   |               |               |
| cg00021275<br>Intergenic                 | CP                                      | + -<br>P-val                    | +<br>2.96E-04 | +<br>3.03E-13  |               | +<br>2.50E-02   | +<br>4.95E-05  | +<br>8.31E-09 | -<br>1.36E-03   | +<br>1.14E-03 | +<br>1.26E-06 |
| cg24247537<br>PTDSS2 (Body)              | CAC                                     | + -<br>P-val                    | +<br>1.89E-08 | +<br>4.80E-05  | +<br>9.08E-16 |                 | +<br>2.05E-05  |               |                 |               | +<br>9.70E-04 |
| cg21271420<br>Intergenic                 | CP                                      | + -<br>P-val                    | -<br>9.67E-27 | -<br>7.86E-07  |               | +<br>3.41E-04   |                |               |                 |               |               |
| cg08867471<br>Intergenic                 | CP                                      | + -<br>P-val                    |               | -<br>5.76E-06  |               |                 | -<br>6.96E-07  |               |                 |               |               |
| cg03636183<br>F2RL3 (Body)               | CP                                      | + -<br>P-val                    |               | -<br>2.42E-03  | -<br>3.23E-09 |                 | -<br>8.48E-45  | +<br>4.73E-02 |                 |               | -<br>1.39E-02 |
| cg01940273<br>Intergenic                 | CP                                      | + -<br>P-val                    | -<br>4.84E-06 | -<br>2.82E-10  |               |                 | -<br>1.09E-62  |               |                 |               |               |
| cg04761231<br>RPL35 (Body)               | CP                                      | + -<br>P-val                    | -<br>2.50E-04 | +<br>1.46E-48  | +<br>6.44E-07 |                 | -<br>1.18E-04  |               |                 |               |               |
| cg19266329<br>Intergenic                 | CP                                      | + -<br>P-val                    | -<br>1.10E-19 | -<br>1.72E-08  | -<br>1.60E-03 |                 | -<br>1.45E-06  |               |                 |               | -<br>1.80E-05 |
| cg15501219<br>Intergenic                 | CP                                      | + -<br>P-val                    | +<br>9.82E-05 | -<br>1.17E-111 |               |                 | +<br>3.69E-04  | +<br>7.31E-05 |                 |               | +<br>5.80E-06 |
| cg24574691                               | CP                                      | + -                             |               | +<br>-         | -<br>-        | -<br>-          |                |               |                 | +<br>-        |               |

| CpG Illumina ID and nearby gene location | ~ Carotid Plaque (CP) or CAC (FDR≤0.05) | Beta direction (+/-) or P-value | Age           | Sex (male)    | Race (Black)  | Race (Hispanic) | Current smoker | BMI           | HDL cholesterol | Hypertension  | Diabetic      |
|------------------------------------------|-----------------------------------------|---------------------------------|---------------|---------------|---------------|-----------------|----------------|---------------|-----------------|---------------|---------------|
| Intergenic                               |                                         | P-val                           |               | 1.21E-02      | 3.91E-06      | 2.11E-02        |                |               |                 | 5.72E-03      |               |
| <b>cg00834988</b><br><b>AUTS2 (Body)</b> | CP                                      | + -<br>P-val                    |               | +<br>3.87E-02 |               |                 | +<br>2.38E-10  |               |                 | +<br>2.05E-02 | +<br>2.66E-03 |
| <b>cg13200854</b><br><b>MMRN1 (Body)</b> | CP                                      | + -<br>P-val                    | -<br>4.70E-14 | -<br>6.14E-03 |               |                 | -<br>8.55E-03  |               |                 | -<br>1.54E-02 |               |
| <b>cg08958747</b><br><b>RAB26 (Body)</b> | CP                                      | + -<br>P-val                    | -<br>7.46E-29 | +<br>3.70E-07 | +<br>2.56E-05 | +<br>1.79E-02   | -<br>1.15E-03  |               |                 |               |               |
| <b>cg01763719</b><br>Intergenic          | CP                                      | + -<br>P-val                    |               |               |               |                 | +<br>1.26E-06  | +<br>1.24E-02 |                 |               |               |

\* Adjusting for demographic variables; sorted by most significant association with carotid plaque score or CAC; non-significant ( $p \geq 0.05$ ) associations are left blank; 29 CpGs bolded had genome-wide FDR<0.05 for a direction of association with the majority of CVD risk factors similar to those expected based on the methylation association with atherosclerosis and atherosclerosis associations with risk factors; LDL cholesterol was not associated with any atherosclerosis-associated CpG methylation.

**Supplementary Table 9.** siRNA Knockdown of ARID5B Alters Immune/inflammatory Response and Lipid Metabolism Genes.

| Terms                                    |            | Down-regulated genes                                                                                                                                                                                                                                                                                                                                                                                                                                                                                                                                                                                                                                                                                                                                                                                                                                                                                                                                                                                                                                                                                                                                                                                         | Up-regulated genes                                                                                                                                                                                                                                                                                                                                                                                                                                                                                                                                          |
|------------------------------------------|------------|--------------------------------------------------------------------------------------------------------------------------------------------------------------------------------------------------------------------------------------------------------------------------------------------------------------------------------------------------------------------------------------------------------------------------------------------------------------------------------------------------------------------------------------------------------------------------------------------------------------------------------------------------------------------------------------------------------------------------------------------------------------------------------------------------------------------------------------------------------------------------------------------------------------------------------------------------------------------------------------------------------------------------------------------------------------------------------------------------------------------------------------------------------------------------------------------------------------|-------------------------------------------------------------------------------------------------------------------------------------------------------------------------------------------------------------------------------------------------------------------------------------------------------------------------------------------------------------------------------------------------------------------------------------------------------------------------------------------------------------------------------------------------------------|
| <b>Bio-Functions</b>                     | <b>FDR</b> |                                                                                                                                                                                                                                                                                                                                                                                                                                                                                                                                                                                                                                                                                                                                                                                                                                                                                                                                                                                                                                                                                                                                                                                                              |                                                                                                                                                                                                                                                                                                                                                                                                                                                                                                                                                             |
| <b>Inflammatory response</b>             | 1.10E-06   | ABCD1, ABHD12, ABR, ADA, ADORA2B, ADORA3, ADRBK1, AGT, AKT1, ALOX5, APOE, ATF3, ATM, AXL, BCL6, C3AR1, C5AR1, CASP1, CASP4, CCL14, CCL3, CCL3L1, CCL4, CCRL2, CD14, <b>CD1D</b> , CD36, CD4, <b>CD74</b> , CD9, CDC42, CIRBP, CKLF, CLCF1, CLCN7, CORO1A, CSF1R, CST3, CTSS, CTSG, CXCL2, CYBB, CYSLTR1, DUSP10, EDN1, EGR1, EIF2AK1, ELANE, ELMO1, ENG, EPAS1, ERN1, F11R, FABP4, FCGR1A, FCGR2A, <b>FCGRT</b> , FGR, FOXF1, FPR1, GNA13, GNAI2, GRN, HAVCR2, HDAC4, HEBP1, <b>HLA-DMA</b> , <b>HLA-DRA</b> , <b>HLA-DRB1</b> , <b>HLA-DRB5</b> , <b>HLA-DRB6</b> , HMOX1, HPSE, <b>IFNB1</b> , <b>IL1A</b> , INPP5D, <b>IRF3</b> , ITGB1, KLF4, LAT, LGALS9, LILRB3, LIPA, LTB4R, LY96, MCL1, MDK, MPP1, MR1, MYO1F, MYO9B, NCKAP1L, NFIL3, NFKBIZ, NLRP3, NR4A2, OSTM1, PARP4, PDE4B, PECAM1, PIK3CB, PLA2G7, PLAU, PLCG2, PON2, PPARG, PPT1, PRDM1, PRKCA, PRNP, PROCR, PRTN3, PSEN2, <b>PSMB8</b> , <b>PSMB9</b> , PTGER2, PTGER4, PTGS1, PTGS2, PTPN11, PTPRO, PYCARD, RAC2, RGS1, RHOB, RIPK3, RNASE2, RPL13A, SERPINF1, SIGIRR, SLC11A1, SLC1A5, SMAD7, SPHK1, <b>STAT1</b> , <b>STAT2</b> , STAT6, STK39, SYK, TBXAS1, TGM2, TLR4, <b>TNF</b> , TNFRSF14, TNFSF14, TREM2, TYROBP, ULBP1, WAS, ZFP36 | ABCF1, AHR, ALOX5AP, ANGPLT4, AQP9, BID, BRD2, CCND1, CD40, CD44, CEBPD, CXCL6, E2F2, FEM1A, FYN, GJA1, HDAC9, <b>HLA-H</b> , HNRNPAA0, ICAM1, IDO1, IFNAR1, IKBKB, <b>IL10</b> , IL10RA, IL18RAP, IL23A, JMJD6, LILRB3, LRRIG2, LYN, LYST, MAPK7, MGLL, MIF, NCL, NFE2L1, NFKBIB, NFX1, NOD2, NOTCH1, OLR1, ORM1, P2RY6, PGLYRP2, PIK3CD, PPM1D, PRKCD, PTX3, S100A12, S100A8, S100A9, SBNO2, SFRP1, SIRPA, SLC33A1, SLC7A2, SMAD3, SRC, STAT4, STAT5A, TICAM2, TNFAIP8L2, TNFRSF1A, TNFRSF1B, TNFRSF4, TNFRSF9, TNIP1, TRADD, TRAF3IP2, TRNT1, TSC1, VAV3 |
| <b>Chemotaxis of leukocytes</b>          | 1.38E-02   | ADORA3, ALOX5, APOE, C3AR1, C5AR1, CCL14, CCL3, CCL3L1, CCL4, CCRL2, CD4, CD74, CD9, CDC42, CKLF, CORO1A, CSF1R, CST3, CTSG, CXCL2, CYBB, CYSLTR1, EDN1, ELANE, ELMO1, FCGR2A, FGR, FPR1, GNA13, GNAI2, GRN, HEBP1, HPSE, IFNB1, IL1A, INPP5D, LAT, LGALS9, LILRB3, LTB4R, MDK, MPP1, MYO1F, MYO9B, NCKAP1L, PDE4B, PIK3CB, PLA2G7, PLAU, PLCG2, PON2, PPARG, PRKCA, PRNP, PRTN3, PTPN11, PTPRO, RAC2, RGS1, RHOB, RNASE2, RPL13A, SPHK1, STAT6, SYK, TLR4, TNF, TNFRSF14, TNFSF14, WAS                                                                                                                                                                                                                                                                                                                                                                                                                                                                                                                                                                                                                                                                                                                      | AQP9, CCND1, CD40, CXCL6, FYN, ICAM1, IKBKB, IL10, IL23A, JMJD6, LYN, LYST, MIF, NOD2, PIK3CD, S100A12, S100A8, S100A9, SMAD3, TNFRSF1A, TRAF3IP2, TSC1, VAV3                                                                                                                                                                                                                                                                                                                                                                                               |
| <b>Migration of phagocytes</b>           | 1.69E-03   | ADAM15, AGT, APOE, BMPR2, CCL3, CCL4, CD209, CD74, CD86, CDC42, CSF1R, CTSG, CTSZ, CXCL2, CYBB, DOCK8, ENG, EPAS1, F11R, FGR, FLNA, FPR1, HCLS1, IFNB1, INPP5D, ITGAX, ITGB1, MDK, MYO9B, NAB2, NARS, NLRP3, PDE4B, PECAM1, PLAU, PLCB2, PPARG, PRNP, PTGDS, PTGS2, RAC2, RHOB, RTN4, SEMA4D, SERPINF1, TIMP2, TIMP3, TLN1, TLR4, TNF, TREM2, TYROBP, VCAN, WAS                                                                                                                                                                                                                                                                                                                                                                                                                                                                                                                                                                                                                                                                                                                                                                                                                                              | ABL1, CCND1, CD40, CD44, CD58, CD80, CD99, CXCL6, ICAM1, ICAM2, IL10, IL10RA, MIF, P2RY6, PIK3CD, PPM1D, PVR, QPCT, S100A8, S100A9, SH2B3, SIRPA, TNFAIP8L2, TNFRSF1A, TNFRSF9, VAV3                                                                                                                                                                                                                                                                                                                                                                        |
| <b>Phagocytosis of blood cells</b>       | 3.00E-03   | BIN1, BTK, CD14, CD36, CD93, CDC42, CERK, CLCN3, CORO1A, CORO1C, CYP2S1, DEF6, EIF2AK1, <b>FCGR1A</b> , <b>FCGR1B</b> , <b>FCGR1C</b> , FCGR2A, FGR, FPR1, GAB2, <b>GAS6</b> , GLRX, HMOX1, INPP5D, ITGAX, MERTK, PIK3CB, PLAU, RAC2, STIM1, SYK, TGM2, TLR4, TNF, TREM2, UCP2, WAS                                                                                                                                                                                                                                                                                                                                                                                                                                                                                                                                                                                                                                                                                                                                                                                                                                                                                                                          | CD44, FYN, IFNAR1, IRF8, JMJD6, LYN, MIF, NOD2, PTX3, S100A9, SIRPA, SRC                                                                                                                                                                                                                                                                                                                                                                                                                                                                                    |
| <b>Apoptosis of leukocytes</b>           | 6.79E-04   | ABCG1, ADA, ADORA3, AKT1, ANPEP, APOE, ASAH1, ATF3, ATM, BTK, C3AR1, CASP1, CASP4, CAT, CCL3, CCL4, CD14, CD4, CD9, CDC42, CORO1A, CXCL2, CYBB, DOCK8, EGR1, EGR3, ETS2, FCGR1A, FGL2, FOSL1, GADD45B, GPR132, HAVCR2, IFNB1, IL1A, INPP5D, IRF3, IRF4, IRS2, ITGB1, ITPR1, KLF4, LGALS9, MAP2K5, MAP4K1, MCL1, MERTK, MYC, NFATC1, NR4A1, NR4A3, PECAM1, PKN1, PLCG2, PPARG, PRKCA, PRTN3, PTGER4, RAC2, RCAN1, RIPK3, SERPINF1, SLC39A10, SMAD7, SPHK1, ST14, STAT1, STAT6, TLR4, TMEM109, TNF, TNFRSF21, TNFSF14, TOP2A, WAS                                                                                                                                                                                                                                                                                                                                                                                                                                                                                                                                                                                                                                                                              | ABL1, AHR, BCL11A, BCL2, BCL2L1, BCL3, BID, BMF, CASP2, CCDC86, CD40, CD44, CD70, CD80, CDKN1B, CREB1, DLL4, DNAJA3, E2F2, FBXW7, FYN, ICAM1, IDO1, IKBKB, IKBKE, IL10, IL7R, IRF8, LILRB1, LYN, MIF, MYB, NFKBIB, NOTCH1, OGT, PERP, PIK3CD, PIM1, POLR3E, PPM1D, PRELID1, PRKCD, RCAN2, S100A8, SERPINB9, SMAD3, SOD2, ST6GAL1, STAT5A, TICAM2, TNFAIP8L2, TNFRSF1A, TNFRSF1B, TNFRSF4, TNFRSF9, TNFSF10, TNFSF13B, TRAF3IP2, TSC1, TSC22D3, VAV3                                                                                                         |
| <b>Synthesis of lipid</b>                | 2.10E-04   | ABCG1, ACSL3, ACSS2, ADA, ADORA2B, ADRBK1, AGPAT1, AGPAT2, AGT, AKT1, ALDH1A2, ALOX5, ANPEP, APOC1, APOC2, APOE, ARV1, ASAH1, ATF3, B3GNT5, BMP2, BMPR2, BRE, C5AR1, CASP1, CD14, CD209, CD96, CD4, CD74, CD9, CDC42, CDIPT, CERK, CHKB, CLN3, CYP1B1, DAB2, DGAT1, DHRS9, DOLK, EDN1, EEF1A1, EGR1, ERLIN2, FABP5, FAR1, FCGR1A, FCGR2A, FGR, FOSL1, FOXA1, FOXO4, FPR1, GBA, GBGT1, GDF15, GNPAT, <b>HMGCS1</b> , HMOX1, HOXA10, IL1A, INPP5D, INPPL1, INSIG1, ITGB1, LTA4H, LTB4R, LTC4S, MAPK3, ME2, MGST2, MITF, MKNK1, MYC, NPC2, NR4A1, NR4A2, NR4A3, NSMAF, PDHB, PDSS1, PDSS2, PIGB, PIGP, PIGY, PIK3C2A, PIK3CB, PISD, PITPNM1, PLAU, PLCG2, PMVK, PNPLA2, PNPLA6, PON2, POR, PPARG, PRKAA1, PRKAG2, PRKCA, PRNP, PTGDS, PTGER2, PTGS1, PTGS2, PTPN11, RBP1, RGS2, RXRA, <b>SC5DL</b> , <b>SCD</b> , SH3KBP1, SIGIRR, SLC9A3R1, SPHK1, SPTLC1, ST3GAL5, SYK, TBXAS1, TLR4, TNF, TRERF1, TRIB3                                                                                                                                                                                                                                                                                                      | ACAT2, ACSL5, AHR, AKR1B1, ALOX5AP, ATP5J, BCL2, BCL2L1, BMP6, BNIP3, BRD2, C1QTNF1, CD40, CD82, CES1, CREB1, CYP7B1, DEGS1, FAF2, FYN, IGF1BP4, IL10, IL18RAP, INSIG2, LYN, MAP3K1, MAP3K8, MCAT, ME1, MIF, NR5A2, OLR1, OSBP, PEX11B, PGS1, PIAS1, PIGV, PIK3C2B, PIK3CD, PPAT, PRDX2, PRKCD, PTPMT1, PTX3, RDH10, SLC1A3, SLC35A2, SMAD3, SMAD4, STAT5A, TNFRSF1A, TNFRSF1B, TNFSF10, UGCG                                                                                                                                                               |
| <b>Canonical pathways</b>                | <b>FDR</b> |                                                                                                                                                                                                                                                                                                                                                                                                                                                                                                                                                                                                                                                                                                                                                                                                                                                                                                                                                                                                                                                                                                                                                                                                              |                                                                                                                                                                                                                                                                                                                                                                                                                                                                                                                                                             |
| <b>Leukocyte Extravasation Signaling</b> | 8.31E-03   | ACTB, ACTG1, ACTN1, ACTN4, ARHGAP4, ARHGAP5, ARHGAP9, ATM, BTK, CDC42, CLDN1, CLDN23, CTNNA1, CYBB, F11R, GNAI2, ITGB1, MAP3K4, MAPK13, MMP10, NCF2, NCF4, PECAM1, PIK3C2A, PIK3CB, PIK3R2, PLCG2, PRKCA, PRKCH, PTPN11, RAC2, SIPA1, TIMP2, TIMP3, VCL, WAS                                                                                                                                                                                                                                                                                                                                                                                                                                                                                                                                                                                                                                                                                                                                                                                                                                                                                                                                                 | ABL1, CD44, CD99, CRKL, ICAM1, PIK3C2B, PIK3CD, PRKCD, PTK2, RASGRP1, RDX, SRC, VAV3                                                                                                                                                                                                                                                                                                                                                                                                                                                                        |

Enrichment from IPA ingenuity, including genes significantly (FDR<0.05) altered after siARID5B in in LPS stimulated human THP1-monocytes, compared to a background of all genes with detectable expression

## Supplementary Methods

### RNA sequencing

Total RNA samples were enriched for mRNA, by depleting rRNA using the MICROBExpress kit from Ambion and following the manufacturer's instructions. Poly(A) mRNA was enriched, and Illumina compatible, strand-specific libraries were constructed using Illumina's TruSeq Stranded mRNA HT Sample Prep Kit (Illumina, RS-122-2103). 1  $\mu$ g of total RNA with RIN  $\geq$  8.0 was converted into a library of stranded template molecules suitable for subsequent cluster generation and sequencing by Illumina HiSeq. The libraries generated were validated using Agilent 2100 Bioanalyzer and quantitated using Quant-iT dsDNA HS Kit (Invitrogen) and qPCR. Six individually indexed cDNA libraries were pooled and sequenced on Illumina HiSeq, resulting in an average of close to 30 million reads per sample. Libraries were clustered onto flow cells using Illumina's TruSeq PE Cluster Kit v3 (PE-401-3001) and sequenced 2X100 cycles using TruSeq SBS Kit -HS (FC-401-3001) on an Illumina HiSeq<sup>TM</sup> 2500. A total of 64 lanes were run to generate approximately 30 million 2 x 101 Paired End reads per sample. The Illumina HiSeq Control Software (HCS v2.0.12) with Real Time Analysis (RTA v1.3.61) was used to provide the management and execution of the HiSeq 2500.

Illumina sequencing runs were processed to de-multiplex samples and generate FastQ files using the Illumina provided *configureBclToFastq.pl* script to automate running CASAVA 1.8.4 using default parameters for removal of sequencing reads failing the chastity filter (yes) and mismatches in the barcode read (0). Following generation of FastQ files, reads were trimmed to remove poor quality reads (or read tails) using *Btrim* (5 base sliding window average with  $Q > 15$ )<sup>1</sup> and then trimmed to remove any adaptor sequence present in the reads using custom perl scripts (trim sequences containing 11 base tag of adaptor, final length  $>40$  bases). The *Ensembl* GRCh37 *Homo Sapiens* reference file, annotations and Bowtie2 indexes were downloaded from the *igenomes.com* website (10-Apr-2013) for mapping of the sequencing reads to the genome and read counting. *Bowtie2* (2.1.0) and *TopHat2* (2.0.8) were used to map the sequencing reads to the genome using a mate-inner-distance of 100 bp and '*firststrand*' options<sup>2,3</sup>. Following alignment, *bam* files were merged using the *samtools* (0.1.19) merge function<sup>4</sup>, and read counts per gene were obtained using *HTSeq* (0.5.4p3) (<http://www-huber.embl.de/users/anders/HTSeq/doc/overview.html>). The '*intersection-strict*' overlap resolution mode and '*stranded reverse*' options were used in *HTSeq*.

Data pre-processing and QC analyses were performed in R (<http://www.r-project.org/>) using *Bioconductor* (<http://www.bioconductor.org/>) packages. The transcript-based raw count data files for each sample from *TopHat2* were combined into a count matrix with 56,303 features (rows) and 374 MESA samples (columns). The median total count per sample was 28.8 million. Reads denoted by *TopHat2* as "no\_feature", "ambiguous", "too\_low\_aQual", "not\_aligned", "alignment\_not\_unique" were removed. Counts were converted to Counts Per Million (CPM) using the *cpm* function of the *edgeR* package<sup>5</sup>, and all features with CPM  $\leq 0.25$  in  $\geq 90\%$  of the 374 MESA samples were removed. Features assigned to the mitochondrial genome were removed as well. Using the *biomaRt* package and querying the *Ensembl BioMart* database, *Entrez Gene IDs*, Gene Symbols, genome coordinates, gene length and percent GC content were obtained for 12,585 features which had a corresponding *Entrez ID* or Illumina HumanHT-12 v4 probe ID. To be able to continue to use the flexible and computationally efficient linear modeling functions in R, we transformed the raw count data to log counts per million ( $y = \log\text{CPM}$ ) as recommended by Law et al (2013)<sup>6</sup>:

$$y_{gs} = \log_2 \left( \frac{c_{gs} + 0.5}{T_s + 1} \cdot 10^6 \right)$$

where  $c_{gs}$  is the raw count of gene transcript  $g$  in sample  $s$ , and  $T_s$  is the normalized total count of sample  $s$ , using the Trimmed Mean of M-values (TMM) normalization method<sup>7</sup> as implemented in the *calcNormFactors* function in the *edgeR Bioconductor* package<sup>5</sup>. We either performed only this TMM normalization, or we applied quantile normalization (QN) to the logCPM values. Because the logCPM values' variance tends to decrease with increasing count for smaller counts, we used the *voom* function of the *limma* package<sup>8</sup> to estimate the mean-variance trend non-parametrically and to predict the residual variance of each individual observation for each gene. Then we incorporated the inverse residual variances into the linear modeling (*lm*) as weights in a standard manner. For the logCPM data, we imposed the same low variance filter that we had used for the microarray data, removing another 192 features with the lowest variance and retaining 12,380 features for analysis. We then performed weighted linear model analyses with the otherwise exact same models as for the microarray data.

### **Bisulfite treatment of genomic DNA and pyrosequencing**

Genomic DNA from monocytes was bisulfite modified using the EZ DNA Methylation™ Kit (Zymo Research Co., Irvine, CA) according to the manufacturer's protocol for the Infinium methylation assay. Primers (F1-Biotinated 5'-GAAAATAGGAAATGTTTAATTGTG-3', R1 5'-TCACTATACTCCTAACCAACCAACC-3') for pyrosequencing assays of *ARID5B*-cg25953130 were designed using PSQ assay design software version 1.0.6 (Biotage, Uppsala,

Sweden). PCR was performed with the PyroMark PCR Master Mix (Qiagen Inc.). Pyrosequencing was conducted using PyroMark Gold Q98 Reagents (Qiagen Inc.). Methylation values for each CpG site were calculated using Pyro Q-CpG software 1.0.9 (Biotage).

### Supplementary References

1. Kong, Y. Btrim: a fast, lightweight adapter and quality trimming program for next-generation sequencing technologies. *Genomics* **98**, 152-153 (2011).
2. Langmead, B., Trapnell, C., Pop, M., & Salzberg, S.L. Ultrafast and memory-efficient alignment of short DNA sequences to the human genome. *Genome Biol.* **10**, R25 (2009).
3. Trapnell, C., Pachter, L., & Salzberg, S.L. TopHat: discovering splice junctions with RNA-Seq. *Bioinformatics.* **25**, 1105-1111 (2009).
4. Li, H. *et al.* The Sequence Alignment/Map format and SAMtools. *Bioinformatics.* **25**, 2078-2079 (2009).
5. Robinson, M.D., McCarthy, D.J., & Smyth, G.K. edgeR: a Bioconductor package for differential expression analysis of digital gene expression data. *Bioinformatics.* **26**, 139-140 (2010).
6. Law, C.W., Chen, Y., Shi, W., & Smyth, G.K. Voom! Precision weights unlock linear model analysis tools for RNA-seq read counts. Preprint available at <http://www.statsci.org/smyth/pubs/> . 2013.  
Ref Type: Generic
7. Robinson, M.D. & Oshlack, A. A scaling normalization method for differential expression analysis of RNA-seq data. *Genome Biol.* **11**, R25 (2010).
8. Smyth, G.K. Limma: linear models for microarray data in *Bioinformatics and Computational Biology Solutions using R and Bioconductor* (eds. Gentleman, R., Carey, V., Dudoit, S., Irizarry, R. & Huber, W.) 397-420 (Springer, New York, 2005).
